# Dysregulated gene expression of imprinted and X-linked genes: a link to poor development of bovine haploid androgenetic embryos

1 **Luis Aguila, Jacinthe Therrien, Joao Suzuki, Mónica García, Amanda Trindade, Lawrence**  
2 **C. Smith\***

3 Département de biomedicine vétérinaire, Centre de recherche en reproduction et fertilité, Université  
4 de Montreal, Saint-Hyacinthe, QC, J2S 2M2, Canada.

5 **\* Correspondence:**

6 Corresponding Author

7 [lawrence.c.smith@umontreal.ca](mailto:lawrence.c.smith@umontreal.ca)

8 **Keywords: uniparental embryo, paternally imprinting, epigenetic, bovine ICSI, diploid**  
9 **embryo, oocyte enucleation.**

## 10 **Abstract**

11 Mammalian uniparental embryos are efficient models for genome imprinting research and allow  
12 studies on the contribution of the paternal and maternal genome to early embryonic development.  
13 In this study, we analyzed different methodologies for production of bovine haploid androgenetic  
14 embryos (hAE) to elucidate the causes behind their poor developmental potential. The results  
15 showed that hAE can be efficiently generated by using intracytoplasmic sperm injection and oocyte  
16 enucleation at telophase II. Although haploidy does not disturb early development up to around the  
17 3<sup>rd</sup> mitotic division, androgenetic development is disturbed after the time of zygote genome  
18 activation those that reach the morula stage are less capable to become a blastocyst. Analysis of  
19 gene expression indicated abnormal levels of methyltransferase 3B and key long non-coding RNAs  
20 involved in X-chromosome inactivation and genomic imprinting of the KCNQ1 locus, which is  
21 associated to the methylation status of imprinted control regions of XIST and KCNQ1OT1. Thus,  
22 our results seem to exclude micromanipulation consequences and chromosomal abnormalities as  
23 major factors in developmental restriction, suggesting that their early developmental constraint is  
24 regulated at an epigenetic level.

25

26

27

## 28 1. Introduction

29

30 In contrast to lower animal classes that can develop from a single parent by parthenogenesis,  
31 mammals have developed parental-specific epigenetic strategies such as genomic imprinting that  
32 require the contribution from the paternal and maternal genomes to develop fully to term.  
33 Nonetheless, early development can be achieved very efficiently from uniparental embryos in  
34 mammals using different artificial oocyte activation and/or micromanipulation techniques, which  
35 has been extremely useful in delineating genomic function, imprinting status and its role in  
36 ontogenesis (Cruz et al., 2008; Hu et al., 2015b).

37 Diploid androgenetic and gynogenetic/parthenogenetic embryos possess two sets of paternal or  
38 maternal genomes, respectively, while their haploid counterparts contain only one paternal or  
39 maternal genome. Although haploid development is a normal part of the life cycle for some animals  
40 (e.g., parasitic wasps), haploidy in mammals is restricted to gametes, which are structurally  
41 specialized for fertilization and mitotically incompetent (Shuai and Zhou, 2014).

42 Uniparental haploid embryos are efficient models for genome imprinting research and enable  
43 studies on the contribution of the paternal and maternal genome to early embryonic development.  
44 Moreover, haploid embryos have been used to derive embryonic stem cells and hold great promise  
45 for functional genetic studies and animal biotechnology (Panneerdoss et al., 2012; Kokubu and  
46 Takeda, 2014; Bai et al., 2016; Bai et al., 2019).

47 Although haploid embryonic stem cells have been obtained in several mammals (Leeb and Wutz,  
48 2011; Yang et al., 2013; Zhong et al., 2016), most reports have indicated poor rates of blastocyst  
49 formation, suggesting impairments at early stages of embryonic development. In mice, studies have  
50 revealed that the preimplantation developmental potential of haploids is significantly impaired  
51 relative to diploid embryos due mainly to the disruption of gene regulatory mechanisms (Latham  
52 et al., 2002) and abnormal imprinted gene expression (Hu et al., 2015b). However, there are only a  
53 few studies characterizing the causes of limited development of haploid androgenetic embryos  
54 (hAE) in other mammals models, particularly in domestic species where the androgenetic  
55 embryonic stem cells would provide an useful route for genetic manipulations (Lagutina et al.,  
56 2004; Matsukawa et al., 2007; Park et al., 2009; Vichera et al., 2011).

57 The generation of mammalian hAE have been achieved by using a variety of methods. In mouse  
58 species the bisection of zygotes after fertilization (Tarkowski and Rossant, 1976), the removal of  
59 the maternal pronucleus from fertilized eggs at the pronuclear stage (Yang et al., 2012), and the  
60 injection of sperm into enucleated oocytes (Li et al., 2012; Yang et al., 2012) have been applied  
61 successfully. However, in bovine species the efforts to visualize and enucleate zygotes at pronuclear  
62 stages is hampered by the presence of dense lipid vesicles, and thus, usually, removal of the oocytes  
63 metaphase spindle is performed pre-IVF, as in the case of SCNT, at approximately 18 to 20 h after  
64 beginning of *in vitro* maturation (MII enucleation). Otherwise, during the telophase to anaphase  
65 transition of meiosis II the second polar body is a reliable indicator of the position of the oocyte's  
66 spindle and it can be reliably used to enucleate mammalian oocytes (Bordignon and Smith, 1998;  
67 Kuznyetsov et al., 2007; Sagi et al., 2019).

68 Therefore, our aims were to establish an efficient method to produce bovine hAE and identify the  
69 potential causes of their severely limited developmental potential. Our results indicate that the  
70 developmental restriction of the androgenetic haploid embryos occurs at the time of the major  
71 transcriptional activation and it is associated with the altered expression of key epigenetically  
72 regulated genes. The significance and possible explanations for these findings are discussed.

73

## 74 2. Material and methods

75 Oocyte collection and *in vitro* maturation

76 Bovine ovaries were obtained from a local slaughterhouse and transported to the laboratory in  
77 sterile 0.9% NaCl at 25–30°C in a thermos bottle. Cumulus–oocyte complexes (COCs) were aspirated  
78 from 5 mm to 10 mm antral follicles using a 12-gauge disposable needle. For in vitro maturation  
79 (IVM), COCs with several cumulus cell layers were selected, washed and placed in maturation  
80 medium composed of TCM199 (Invitrogen Life Technologies), 10% fetal bovine serum (FBS), 0.2  
81 mM pyruvate, 50 mg/mL gentamicin, 6 µg/mL luteinizing hormone (Sioux Biochemical), 6 µg/mL  
82 follicle-stimulating hormone (Bioniche Life Science) and 1 µg/mL estradiol (Sigma). In vitro  
83 oocyte maturation was performed for 22-24 h at 38.5°C in a humidified atmosphere at 5% CO<sub>2</sub>.

84

85 Sperm preparation.

86 Straws of non-sexed and sex-sorted semen stored in liquid nitrogen were thawed for 1 min in a  
87 water bath at 35.8°C, added to a discontinuous silane-coated silica gradient (45 over 90% BoviPure,  
88 Nidacon Laboratories AB), and centrifuged at 600 X g for 5 min. The supernatant containing the  
89 cryoprotectant and dead spermatozoa were discarded, and the pellet with viable spermatozoa was  
90 re-suspended in 1 mL of modified Tyrode's lactate (TL) medium and centrifuged at 300 X g for 2  
91 min.

92

93 In vitro fertilization

94 After 22-24 h of IVM, COCs were washed twice in TL medium before being transferred in groups  
95 of 5 to 48 µl droplets under mineral oil. The in vitro fertilization (IVF) droplets consisted of  
96 modified TL medium supplemented with fatty-acid-free BSA (0.6% w/v), pyruvic acid (0.2 mM),  
97 heparin (2 µg/mL) and gentamycin (50 mg/mL). COCs were transferred to IVF droplets 15 min  
98 prior to adding the spermatozoa. To stimulate sperm motility, penicillamine, hypotaurine and  
99 epinephrine (2 mM, 1 mM and 250 mM, respectively) were added to each droplet. The selected  
100 spermatozoa were counted using a hemocytometer and diluted with IVF medium to obtain a final  
101 concentration of  $1 \times 10^6$  sperm/mL. Finally, 2 µL of the sperm suspension was added to the droplets  
102 containing the matured COCs. The fertilization medium was incubated at 38.5°C for 18 h in a  
103 humidified atmosphere of 95% air and 5% CO<sub>2</sub>. Presumptive zygotes were denuded by treatment  
104 with 0.1% bovine testicular hyaluronidase.

105

106 Intracytoplasmic sperm injection.

107 Intracytoplasmic sperm injections (ICSI) was performed according to standard protocols (Horiuchi  
108 et al., 2002) on the stage of a Nikon Ti-S inverted microscope (Nikon Canada Inc., Mississauga,  
109 ON, Canada) fitted with Narishige micromanipulators (Narishige International ,Japan) and Piezo  
110 PMM 150HJ/FU (Prime tech Ltd., Japan). Before ICSI, oocytes were denuded of granulosa cells  
111 by gently pipetting in the presence of 1 mg/mL hyaluronidase, selected for the presence of the first  
112 polar body and randomly allocated to experimental groups. After ICSI, oocytes were washed at  
113 least three times and cultured in modified synthetic oviduct fluid (mSOF) media as previously  
114 described by Landry et al. (2016).

115

116 Production of haploid embryos.

117 Bovine haploid androgenetic embryos (hAE) produced by IVF were enucleated by removing the  
118 oocyte's chromosomes (enucleation) either before or after insemination. When enucleating before  
119 IVF, COCs were denuded at 24 h after IVM, the oocytes were then exposed 15 min to 5 µg/mL  
120 cytochalasin B and 10 µg/mL Hoechst 33342 and a small portion ( $\pm 10\%$ ) of the cytoplasm  
121 surrounding the first polar body was removed by aspiration into a micropipette. The aspirated  
122 cytoplasmic bleb was observed under UV light to ascertain whether the metaphase II spindle (MII)

123 had been properly removed at enucleation. Oocytes in which enucleation was performed after IVF  
124 were removed from the fertilization droplet at different times after insemination, denuded of the  
125 cumulus cells by gentle pipetting and those presumptive zygotes with recently extruded second  
126 polar bodies were placed in cytochalasin B and Hoechst 33342 for 15 minutes as described above.  
127 A cytoplasm portion ( $\pm 10\%$ ) surrounding the second polar body was aspirated from the oocyte,  
128 checked for the presence of a telophase-stage (TII) spindle, washed and returned to in vitro culture  
129 medium droplets.

130 On the other hand, bAhE produced by ICSI were obtain by removing the oocyte TII spindle after  
131 4h post-ICSI. Enucleated zygotes were cultured as described above. Parthenogenetic embryos were  
132 produced according (Ock et al., 2003). Briefly, chemical oocyte activation was performed between  
133 20 to 24 h after IVM by 5 min exposure to 5  $\mu\text{M}$  ionomycin (Calbiochem, San Diego, CA, USA).  
134 To obtain haploid parthenotes, ionomycin treatment was followed by incubation in 10 mg/mL  
135 cycloheximide (CHX) for 5 h, which enables complete extrusion of the second polar body. For  
136 diploid parthenogenotes, ionomycin-activated oocytes were exposed for 5 h to CHX and 5 mg/mL  
137 of cytochalasin B to inhibits the extrusion of the second polar body and, thereby, induce  
138 diploidization. After parthenogenetic activation, haploid or diploid parthenotes were washed and  
139 allocated to in vitro culture drops.

140

#### 141 In vitro culture

142 For in vitro culture, groups of 10 embryos were placed in droplets (10  $\mu\text{l}$ ) of modified synthetic  
143 oviduct fluid (mSOF) with non-essential amino acids, 3 mM EDTA, and 0.4% fatty-acid-free BSA  
144 (Sigma-Aldrich) under embryo-tested mineral oil. The embryo culture dishes were incubated at  
145 38.5°C with 6.5% CO<sub>2</sub>, 5% O<sub>2</sub>, and 88.5% N<sub>2</sub> in saturation humidity. Cleavage rate was recorded  
146 at 48 h (Day 2) of culture (IVF and ICSI = Day 0). Morula and blastocyst development rate were  
147 recorded on days 6 and 7 post-fertilization, respectively. Some haploid embryos were cultured for  
148 an extra 24 h to determine blastocyst rates at day 8 (192 h after ICSI). After assessment of  
149 development, embryos were either fixed for cell number evaluation or snap-frozen in liquid N<sub>2</sub> and  
150 stored at -80 °C for RNA extraction.

151

#### 152 Assessments of pronuclear formation and total cell number.

153 Pronuclear formation was assessed at 18-20 h after activation or fertilization and embryo quality  
154 was assessed on the basis of morphology and total cell number. Briefly, embryos at day 7 were  
155 classified morphologically as morula (compacted and >32 cells), early blastocyst (<200  $\mu\text{m}$ ),  
156 expanded blastocyst (>200  $\mu\text{m}$ ), and hatched blastocyst (after complete extrusion from the zona  
157 pellucida). Embryos at different stages were fixed overnight in paraformaldehyde and stained with  
158 Hoechst 33342 (10  $\mu\text{g}/\text{mL}$ ) for 15 min, and total number of cells and pronuclear formation were  
159 observed and analyzed by fluorescence microscopy (Axio Imager M1, Zeiss, Canada).

160

#### 161 Karyotype analysis

162 After culture in the in presence of 0.05  $\mu\text{g}/\text{mL}$  of Colcemid (KaryoMax ®Life Technologies,  
163 Carlsbad, CA, USA) for 5 h. Embryos were exposed to a hypotonic (0.75 M KCl) solution for 10  
164 min to induce swelling. Subsequently, embryos were placed on a clean glass slide in a small volume  
165 of medium. Methanol-acetic acid solution (1:1; v/v) was dropped on the embryos while gently  
166 blowing with the slides placed under the stereoscope and allowed to dry for 15 min at room  
167 temperature. After drying, slides were stained with Hoechst 33342 (10  $\mu\text{g}/\text{mL}$ ) for 15 min.  
168 Chromosome spreads were evaluated at  $\times 1000$  magnification using oil immersion optics and  
169 fluorescence microscopy (Axio Imager M1, Zeiss, Canada). Embryonic cells were classified as  
170 haploid (n=30), diploid (n=60), or aneuploid (n $\neq$  30 or 60) according to the number of  
171 chromosomes.

## 172 Gene specific bisulfite sequencing

173 Genomic DNA extraction and bisulfite treatment were done using a kit (EZDNA methylation-direct  
174 kit, Zymo research). Primers specific for bisulfite-converted DNA were designed within the DMR  
175 region of XIST (gene ID:338325) and KCNQ1OT1 (gene ID:112444897). KCNQ1OT1: F:  
176 GGTTAGAGGAGTATTTTGAAGAGA, R: TCAACCCTCTCAACCAATAA, and for XIST: F:  
177 TTTTGGTTGTAGGGATAATATGGTTGA, R: TCATCTAATTCCATCCTCCACTAACT. Each  
178 PCR reaction was performed in triplicate. The PCR reaction was carried out in a final volume of  
179 50 uL containing 1–2 uL of bisulfite-treated DNA, 0.2 uM each primer, 0.3 mM mixed dNTP, 1X  
180 PCR buffer, 1.5 mM MgCl<sub>2</sub> with 2U of Platimun Taq DNA Polymerase (Invitrogen). The reactions  
181 were performed using an initial 2-min step at 94 °C followed by 45 cycles of 30 sec at 94 °C, 30  
182 sec at 53 °C, 1 min at 72 °C, and a final 5-min step at 72 °C. The PCR products were resolved in  
183 1.2% agarose gels, followed by purification using the QIAquick Gel Extraction kit (Qiagen).  
184 Purified fragments were pooled and subcloned in pGEM-T Easy Vector (Promega). 16 clones for  
185 each sample were picked and sequenced. Validation of the imprinted status of each DMR was  
186 performed as previously described by Lafontaine et al. (2020), by assessing methylation of sperm  
187 DNA (expected methylation > 90% or <10%) and fibroblast cell DNA (40-60% expected  
188 methylation).

189

## 190 RNA extraction and RT-PCR

191 For analysis of gene expression, embryos were pooled for each stage of development: 15 of 8-cell  
192 embryos, 5 morulas, 3 blastocysts and each group was done in triplicate. Total RNA from the pooled  
193 embryos was extracted using the Arcturus PicoPure RNA Isolation kit (Lifetechnologies) and  
194 reverse transcribed into cDNA using SuperScript Vilo (Invitrogen). Quantitative RT-PCR was  
195 performed using the RotorGene SyBr Green PCR kit (Qiagen) in a Rotorgene Q PCR cycler under  
196 the following amplification conditions: 95°C for 5 min, followed by 40 cycles at 95°C for 5 secs  
197 and at 60°C for 10 secs. Primers were designed using Oligo6 software and the geometric means of  
198 three housekeeping genes (GAPDH, ACTB and SF3A) was used for normalization. The stability  
199 of the housekeeping genes across our samples was confirmed using Bestkeeper (Pfaffl et al., 2002).  
200 A list of all primers used can be found in Supplemental Table 1.

201

## 202 Statistical analysis

203 Quantitative data sets are presented<sup>3</sup> as means and standard deviation ( $\pm$  S.D) and analyzed using  
204 one-way ANOVA. Post hoc analysis to identify differences between groups was performed using  
205 Tukey test. Binomial data sets, such as pronuclear formation, were analyzed by using Fisher test.  
206 Differences were considered significant at  $p < 0.05$ .

207

## 208 3. Results

209

### 210 **Haploid androgenetic embryos produced by enucleation after fertilization leads to better** 211 **development, but it is unreliable due to high polyspermy levels**

212 Since the resumption of meiosis in the oocyte by the fertilizing spermatozoa can vary significantly  
213 when using conventional IVF, oocytes were exposed to spermatozoa during different time periods  
214 to identify an optimal fertilization time point at which the second polarbody could be used to locate  
215 the spindle for enucleation. With this purpose, we evaluated developmental potential after removing  
216 presumptive zygotes from the IVF drops at different times after insemination. Results indicated that  
217 second polar bodies were present in 80% of the oocytes by 6 h or more post insemination (hpi)  
218 while only 50% were fertilized with insemination periods of 4 hpi or less. Moreover, removal the  
219 presumptive zygotes from the IVF drop after 6 hpi led to better preimplantation development when

220 compared to the shorter exposure periods to spermatozoa ( $p < 0.05$ ), indicating that a 6 hpi period  
221 was suitable for oocyte enucleation post fertilization (data not shown).

222 Having identified an optimal period to expose oocytes to spermatozoa for enucleations during  
223 extrusion of the second polar body, we performed an experiment to compare the developmental  
224 outcome of putative haploid zygotes that were denuded and enucleated either pre- or post-IVF.  
225 Diploid controls, i.e., denuded but non-enucleated pre- and post-fertilization groups, were cultured  
226 concomitantly. Confirming previous results (Lagutina et al., 2004; Vichera et al., 2011), cleavage  
227 rates at 48 h did not differ between putative haploid and control diploid embryos, indicating that  
228 the first cell divisions are not affected by haploidy or the timing of enucleation. However, blastocyst  
229 development was significantly reduced in haploid embryos, indicating that androgenetic haploidy  
230 disturbs early development beyond the first cleavage. Nonetheless, we found that instead of  
231 performing enucleation at MII, enucleations after IVF produced significantly more 8-cell ( $p < 0.05$ )  
232 at Day 2 and blastocyst ( $p < 0.01$ ) stage embryos at Day 7 after IVF, indicating that enucleation of  
233 the oocyte's spindle before fertilization is more detrimental to the development of haploid  
234 androgenetic embryos (Table 1).

235 Next, we performed DNA staining of the putative haploid zygotes at 20 h after insemination to  
236 examine the number of pronuclei of control and enucleated groups (Table 2). Since the presence of  
237 more than one pronucleus in enucleated and more than two pronuclei in control zygotes is indicative  
238 of polyspermy and/or mitotic errors which causes uncertainty with regard to ploidy in presumptive  
239 haploid (parthenogenetic and androgenetic) zygotes. No significant differences were observed in  
240 the level of multinucleated zygotes, neither between oocytes enucleated before and after-IVF (17%  
241 vs. 34%,  $p = 0.08$ ), nor between enucleated and control groups ( $p > 0.07$ ). Nonetheless, since  
242 approximately one fifth and one third of the putative haploid zygotes derived from enucleated  
243 oocytes before and after-IVF, respectively, contained two or more pronuclei. Therefore, since these  
244 results indicated clearly that the production of bovine hAE by conventional IVF protocols leads to  
245 significant uncertainty with regard to ploidy, an unmistakable method was required to efficiently  
246 eliminate the possibility of polyspermic fertilization when deriving haploid androgenetic zygotes.

247  
248 **Haploid androgenetic embryos can be obtained reliably by intracytoplasmic sperm injection**  
249 **and enucleation of the telophase II spindle**

250 Due to the unreliability of conventional IVF in deriving x, we next examined the use of  
251 intracytoplasmic sperm injection (ICSI) to eliminate the possibility of polyspermic fertilization.  
252 Since better development was achieved by enucleation after IVF, we performed ICSI followed by  
253 enucleation 3-4 h later, i.e. when the telophase-II spindle and the second polar body were easily  
254 identified for microsurgical removal. In order to verify the efficiency of the enucleation procedure  
255 after ICSI, we evaluated the rate of pronuclear formation at 20 h post ICSI (Figure 1; Table 3)  
256 including the parthenogenetic haploid zygotes as a positive control for presence of only one  
257 pronucleus.

258 DNA staining showed that 99% of the enucleated zygotes after ICSI had only one chromatin  
259 structure (Table 3, Figure 1). Additionally, there was a tendency for enucleated oocytes to not  
260 support the complete decondensation of paternal chromatin and formation of a pronucleus when  
261 compared to ICSI controls (35% vs. 21%, respectively), suggesting that the removal of the  
262 telophase spindle at first hours after ICSI disturbs sperm-head decondensation. Together, these  
263 results confirm that the use of ICSI is a more reliable approach to derive bovine haploid  
264 androgenetic zygotes.

265  
266 **Haploid androgenetic embryos develop poorly and slowly to the blastocyst stage**

267 Once the reliability of the ICSI approach for deriving hAE was verified, we next compared early  
268 developmental rates of haploid and diploid control groups at different times of in vitro culture.

269 Because previous reports have shown that androgenetic embryos produced using Y chromosome-  
270 carrying sperm are unable to support development to the blastocyst stage (Latham et al., 2000;  
271 Latham et al., 2002; Yang et al., 2012), we used semen that had been sorted (sexed) to obtain sperm  
272 with an X-chromosome or a Y-chromosome. Except for the IVF group that showed the highest  
273 cleavage rate (90%;  $p < 0.01$ ), all the remaining groups showed similar levels of cleavage (range  
274 72% to 74%) (Table 4). However, the rate of embryos having ~8 cells at 48 h of culture (suppl. Fig.  
275 1) was lower only in haploid parthenogenetic embryos, suggesting that manipulation procedures  
276 involved in generating hAE do not affect early cleaving. Development up to morula and blastocyst  
277 was similar among the diploid IVF and ICSI controls. The haploid parthenogenetic group showed  
278 lower blastocyst rate than biparental embryos, but higher than the hAE (Table 4). On the other hand,  
279 hAE showed the lowest developmental potential (9% and 3% for morula and blastocyst stage,  
280 respectively;  $p < 0.0001$ ) compared to biparental and the haploid parthenogenetic group (Table 4),  
281 indicating that androgenetic haploidy is less suitable for support preimplantation development  
282 compared to the parthenogenetic haploidy. Besides, only hAE produced with sperm carrying X-  
283 chromosome reached the morula and blastocyst stages (Table 4). DNA staining showed that hAE  
284 produced with sperm carrying Y-chromosome did not develop beyond 20 cells (suppl. Fig. 2).  
285 Further assessment of embryo morphology at Day-7 indicated major differences between  
286 androgenetic and the remaining groups (Figure 2). Moreover, assessment of nuclear number of  
287 Day-6 morulae and Day-7 blastocysts showed that androgenotes contained significantly fewer cells  
288 when compared to ICSI control and haploid parthenotes of the same age (Figure 3). Actually, some  
289 androgenetic embryos only reached the blastocyst at Day-8, indicating that the blastulation is  
290 delayed in the few hAE that are able to reach the blastocysts stage (Data not shown). After cleavage,  
291 hAE underwent developmental arrest concurrently with time of zygote genome activation, where  
292 only 13% of the cleaved embryos progressed up to morula stage, compared to haploid parthenotes  
293 (32%) and diploid groups (>40%) (Table 4). In addition, haploid androgenotes arrested once again  
294 at morula stage when only 26% of the Day-6 morula became a blastocyst (Table 4). Since the ratio  
295 of haploid parthenogenetic morulas (68%) that become blastocyst was significantly higher  
296 ( $p < 0.005$ ) than the haploid androgenetic group, these results indicate that, as in the other  
297 mammalian models, the bovine haploid paternal condition is less capable to support early  
298 embryonic development when compared to its maternal counterpart.

299

### 300 **Haploid androgenetic embryos maintain stable ploidy**

301 Chromosomal anomalies have been identified in embryos handled in vitro (Kawarsky et al., 1996;  
302 Rubio et al., 2003; Ross et al., 2008). Therefore, we decided to verify whether the ploidy of the  
303 haploid and diploid embryos was particularly disturbed through karyotyping of metaphase-arrested  
304 cells. Surprisingly, most of the analyzed haploid androgenetic blastomeres (81%) contained normal  
305 haplotype ( $X=30$ ), which contrasted, but not significantly ( $p > 0.05$ ), with the diploid ICSI and  
306 haploid parthenogenetic embryos, that contained fewer (46% and 35%, respectively) normal  
307 karyotypes (Table 5; Figure 4).

308

### 309 **Early cleavage events are not affected in hAE**

310 In humans, developmental anomalies during the first mitotic divisions of in vitro-derived embryos  
311 have been associated with poor gamete qualities and in vitro processing (Hardy et al., 1993; Pelinck  
312 et al., 1998; Alikani et al., 2000; Babariya et al., 2017). In order to elucidate the anomalies  
313 associated with the poor development of haploid hAE, we first evaluated nuclear morphology of  
314 embryos that arrested between 1- to 3-cell stage after 48 h of culture. Apart from IVF-derived  
315 controls, all groups that underwent micromanipulation, such as ICSI, enucleation and chemical  
316 oocyte activation, had higher rate of mitotic anomalies ( $p < 0.001$ ; Figure 5), suggesting that  
317 extensive in vitro manipulation of the oocyte is associated with early-stage developmental  
318 anomalies. Particularly, haploid androgenotes did not present additional anomalies when compared

319 to ICSI-derived embryos, indicating that removal of the oocyte's spindle at telophase does not  
320 further interfere with early cleavage. Together, these results indicate that mitotic errors during first  
321 cleavage divisions (i.e. 2<sup>nd</sup> and 3<sup>rd</sup>) were caused mostly by the micromanipulation procedures,  
322 confirming that the inability to progress up to blastocyst by hAE arises mainly after the zygote  
323 genome activation.

324

### 325 **Altered gene expression of X-linked genes and the KCNQ1 locus in hAE**

326 Since haploid embryos possess exclusively maternal or paternal-derived chromosomes, genomic  
327 imprinting (autosomal or sex-related imprinting) offers another possible explanation to their poor  
328 early development (Latham et al., 2002). For instance, imprinting of the paternal X chromosome  
329 could potentially lead to development anomalies in haploid X chromosome-bearing androgenotes.  
330 Because of this, we analyzed the expression of X-linked genes and some genes previously described  
331 (Jiang et al., 2015) to undergo genomic imprinting in bovine species. To do this, we used two  
332 different stages, at 8- to 16-cell and morula stage embryos, basically to evaluate the expression  
333 levels at the time of the zygote genome activation (ZGA), and the most advanced stage of  
334 development available in haploid androgenotes (development to the blastocyst stage was seriously  
335 limited in this group). In addition, to analyze the effects of sex and ploidy on the gene expression  
336 levels, we included different control groups, such as ICSI female (ICSI using X-chromosome  
337 carrying sperm), ICSI male (ICSI using Y-chromosome carrying sperm), and parthenotes (both,  
338 diploid and haploid). At the time of ZGA (72 hpi), results indicate that the expression patterns of  
339 the X-linked genes XIST, PGK1 and HPRT were similar between haploid androgenotes, haploid  
340 parthenotes and biparental male and female embryos (Figure 6). In contrast, while the IGF2R  
341 imprinted gene did not show variations among groups, imprinted genes belonging to the KCNQ1  
342 locus showed significant differences in expression. KCNQ1OT1, the paternally expressed long  
343 non-coding RNA involved in regulating the KCNQ1 locus, was significantly upregulated in haploid  
344 androgenotes compared to parthenotes (haploids and diploids) and biparental female embryos  
345 (Figure 6). Parthenogenetic embryos barely expressed KCNQ1OT1, confirming its imprinted  
346 nature for exclusive paternal expression. Similarly, CDK1 was upregulated in hAE. However,  
347 PHLDA2 showed lower levels in haploid androgenotes only when compared to diploid parthenotes  
348 (Figure 6).

349 At the morula stage of development (day 6), effects on the expression of X-linked and the KCNQ1  
350 imprinted locus were even further exacerbated. XIST transcript levels were significantly  
351 overexpressed in the haploid androgenotes compared to all the control groups, and PGK1 levels  
352 were higher in haploid androgenotes compared to male biparental embryos (Figure 7). As for the  
353 KCNQ1 imprinted locus, haploid androgenotes showed significant upregulation of KCNQ1OT1  
354 and PHLDA2 in comparison to parthenotes and biparental groups, whereas CDK1NC levels were  
355 unaffected (Figure 7). In contrast, expression patterns of the imprinted genes IGF2R and GNAS  
356 were not altered in haploid androgenotes, indicating that not all imprinted loci are disturbed in  
357 androgenotes. Altogether, the results show that hAE have altered gene expression of X-  
358 chromosome genes and imprinted genes from the KCNQ1 locus, suggesting that the developmental  
359 anomalies observed in haploid androgenotes at early stage of embryogenesis, i.e. at and soon after  
360 ZGA, are regulated at an epigenetic level.

361

### 362 **Dnmt3b expression is downregulated in hAE**

363 Genes expression is often regulated by DNA cytosine methylation, catalyzed by DNA  
364 methyltransferases, and it is often altered during in vitro culture (Lafontaine et al., 2020). Owing to  
365 the dysregulated transcript expression observed in hAE, specifically in genes from the KCNQ1  
366 locus and X chromosome, we analyzed the expression of enzymes related to maintenance (DNMT1)  
367 and de novo (DNMT3B) DNA methylation as well as demethylation (TET1) in haploid  
368 (parthenogenetic and androgenetic) and biparental (ICSI) morula stage embryos. Although no



369 differences were observed between the levels of DNMT1 and TET1 transcripts, DNMT3B  
370 expression was significantly downregulated in androgenetic and parthenogenetic haploid groups  
371 when compared the biparental control embryos (Figure 8A), suggesting that developmental events  
372 that require *de novo* methylation may be impaired in haploid embryos. In contrast, unaltered  
373 expression levels of DNMT1 and TET1 indicate that DNA methylation maintenance and active  
374 demethylation is not affected in both androgenetic and parthenogenetic haploid groups.

### 375 376 **Methylation patterns of the XIST and KCNQ1OT1 DMRs are unaltered in hAE**

377  
378 Finally, to evaluate if the abnormal expression of X chromosome and KCNQ1 locus genes was  
379 associated to alterations in methylation patterns, we performed bisulfite sequencing of the XIST  
380 and KCNQ1 DMRs in morula and blastocyst stage embryos. As observed in other mammalian  
381 species, the bovine XIST DMR region was 50% methylated in adult female fibroblasts and  
382 hypermethylated in adult male fibroblasts, supporting the notion of dosage-compensation by X  
383 chromosome inactivation in female somatic tissues (Figure 8B). On the other hand, the XIST DMR  
384 was hypomethylated in sperm, male and female embryos. Besides, since the XIST DMRs in haploid  
385 androgenotes, and parthenogenetic (haploid and diploid) embryos were all hypomethylated, these  
386 results indicate that the upregulation of XIST expression in hAE is not related to the methylation  
387 status of its DMR.

388  
389 As expected for DMRs controlling imprinted loci, the KCNQ1 DMR was hypomethylated in the  
390 male gamete and approximately 50% methylated in fibroblast and in male and female biparental  
391 (ICSI-derived) morula and blastocyst stage embryos (Figure 8C). Diploid and haploid  
392 parthenogenetic embryos at the morula and blastocysts stage showed an elevated methylation levels  
393 of the KCNQ1 DMR, indicating a hypermethylation of the maternal allele. In contrast, androgenetic  
394 embryos showed hypomethylated pattern at morula and blastocyst stages that resembled the  
395 patterns observed in spermatozoa that are typical of this imprinted locus. These results suggest that  
396 the abnormal expression patterns of genes from the KCNQ1 locus in hAE, i.e. KCNQ1OT1 and  
397 PHADL2, may at least in part be due to an epigenetic dysregulation resulting from the exclusive  
398 presence of the paternal allele.

### 399 400 **DISCUSSION**

401 Here, we analyzed different methodologies for production of bovine hAE and the potential causes  
402 for their limited ability to develop to the blastocyst stage. Our results indicate anomalies in gene  
403 expression of X chromosome and of the KCNQ1 imprinted loci, suggesting the involvement of  
404 epigenetic regulators in the developmental constraints of haploid androgenotes in the bovine  
405 species.

406 Initially, we evaluated the removal of the oocyte spindle (enucleation) before and after in vitro  
407 fertilization on the embryonic development (Latham et al., 2002; Lagutina et al., 2004; Vichera et  
408 al., 2011). The embryos produced by these methods showed similar cleavage rates, but blastocyst  
409 development was seriously limited. In agreement with ours results, previous studies have reported  
410 that most of the bovine hAE are arrested after first cell divisions and that only a few of them can  
411 reach the blastocyst stage (Lagutina et al., 2004; Vichera et al., 2011). In mice, hAE produced by  
412 fertilization of enucleated oocytes also showed limited blastocyst development (11%) compared to  
413 the IVF group (90%) (Kono et al., 1993). Nonetheless, our results showed that their developmental  
414 potential was enhanced when the enucleation was performed post-IVF. In agreement with these  
415 findings others have indicated that enucleation during the telophase stage of second meiosis (TII)  
416 shows advantages over enucleation at the metaphase II stage. For instance, TII enucleation allows  
417 the removal of smaller ooplasm fragments (Bordignon and Smith, 1998; Lee and Campbell, 2006),  
418 can be performed in the absence of UV irradiation (Kuznyetsov et al., 2007; Sagi et al., 2019), and

419 it also allows the selection of the best oocytes for enucleation through the exclusive use oocytes  
420 that respond promptly to fertilization by second polar body extrusion (Kuznyetsov et al., 2007).

421 However, although the production of hAE was feasible by using conventional in vitro fertilization  
422 (IVF), the analysis of pronuclear formation showed a high proportion of multinucleated zygotes,  
423 indicative of polyspermic fertilization, which has been previously reported in mice (Kono et al.,  
424 1993) and cattle (Lagutina et al., 2004). Polyspermic fertilization after bovine IVF can vary between  
425 5% to 25% (Roh et al., 2002; Coy et al., 2005), which makes it an unreliable technique for producing  
426 haploid embryos. To assure the effective monospermic fertilization we used ICSI. In agreement  
427 with previous reports (Latham et al., 2002; Lagutina et al., 2004; Vichera et al., 2011; Yang et al.,  
428 2012), our results showed that haploid androgenetic zygotes can be reliably produced by combining  
429 ICSI and oocyte enucleation.

430 Cleavage rate and cell number of hAE after 48 h of culture indicated that micromanipulation (ICSI  
431 and enucleation) does not influence initial mitotic divisions of early embryonic development.  
432 Nonetheless, although androgenetic haploidy does not impact development up to around the 3<sup>rd</sup> -  
433 4<sup>th</sup> mitotic division, the hAE underwent developmental arrest zygotic genome activation (ZGA) at  
434 the 8-cell stage. In addition, androgenetic embryos that progressed beyond ZGA underwent a  
435 second arrest at the morula stage. Similar results have been reported in cattle (Winger et al., 1997;  
436 Vichera et al., 2011), sheep (Matsukawa et al., 2007), mouse (Kono et al., 1993; Latham et al.,  
437 2002; Hu et al., 2015a; Hu et al., 2015b), and human species (Kuznyetsov et al., 2007; Sagi et al.,  
438 2019). Further development to the blastocyst stage, of both haploid parthenotes and androgenotes  
439 was severely limited compared to diploid embryos, evidencing a deleterious effect of haploidy on  
440 the very early stage of embryogenesis.

441 Since reports in mice have indicated that the presence Y- and/or the absence of a X- chromosome  
442 in haploid androgenetic embryos restricts development beyond the four-cell stage (Latham et al.,  
443 2002; Yang et al., 2012), we used sex-sorted sperm to produce bovine haploid androgenotes. When  
444 using Y-chromosome sorted sperm, development was arrested at a very early stage before  
445 compaction, confirming previously murine studies comparing X- and Y-chromosome carrying  
446 androgenotes. Similarly, we showed that bovine haploid androgenotes derived from X-  
447 chromosome sorted sperm develop poorly and only rarely reach the blastocyst stage. Moreover,  
448 since sex sorting techniques are typically 90% accurate (Sharpe and Evans, 2009), these results  
449 indicate that the poor development of haploid androgenotes produced using X-chromosome sorted  
450 sperm cannot be explained by erroneous use of Y- chromosome sperm. Moreover, assessment of  
451 total cell number and blastocyst morphology in haploid androgenotes, which are positively  
452 correlated with blastocyst quality (Sagirkaya et al., 2006; Kong et al., 2016), showed fewer cells  
453 and delayed blastulation compared not only to diploid controls but also to the haploid parthenotes,  
454 suggesting that the haploid androgenetic condition is less capable to support early development  
455 than haploid gynogenetic condition. On the other hand, the analysis of chromosomal constitution  
456 showed that aneuploidy levels were higher in haploid parthenotes than in androgenotes, excluding  
457 chromosomal segregation errors as a cause of the limited embryonic development in the haploid  
458 androgenotes. Since bovine centrosomes are inherited from the sperm at fertilization and are  
459 responsible for organizing the mitotic spindle of the zygote (Long et al., 1993; Navara et al., 1994;  
460 Navara et al., 1995; Navara et al., 1996; Sutovsky et al., 1996a; Sutovsky et al., 1996b), it is likely  
461 that because the sperm centrosome is the only responsible for spindle formation after the removal  
462 of the oocyte's spindle the hAE maintain a stable karyotype during the subsequent mitotic divisions.

463 According to Matsukawa *et al.* (2007), hAE that undergo early arrest commonly present  
464 micronuclei and picnotic nuclear formation. Because of this, we wanted to evaluate the nuclear  
465 morphology of early arrested zygotes. The hAE, ICSI and parthenogenetic-derived embryos  
466 showed similar rates of anomalies, suggesting that micromanipulation procedures  
467 (ICSI/enucleation and chemical oocyte activation) are related to the early development defects. In  
468 agreement with these results, numerous studies have associated bovine ICSI with several  
469 developmental anomalies such as insufficient sperm head decondensation (Rho et al., 1998; Malcuit

470 et al., 2006), delayed pronuclear formation (Aguila et al., 2017), and altered gene expression (Arias  
471 et al., 2015). However, although such ICSI harmful effects certainly can contribute to the early  
472 developmental failure of androgenotes, they do not explain the development arrest that occurs  
473 beyond ZGA. Accordingly, a study by Latham et al. (2002) indicated that the injection procedure  
474 (ICSI) does not influence in vitro development and excluded chromosomal abnormalities as the  
475 main cause for the limited development of haploid androgenetic mouse embryos. Altogether, the  
476 results above support the notion that the reduced developmental potential of bovine haploid  
477 androgenotes is likely related to gene expression anomalies occurring after ZGA.

478 The effects of paternal haploidy on expression of imprinted genes during early embryogenesis has  
479 not yet been evaluated in the bovine species. Uniparental haploid embryos possess one copy of  
480 either the paternal or maternal genomes, thus theoretically, the expression of imprinted genes would  
481 be either present or undetectable relative to biparental embryos. The silencing of one of the X  
482 chromosomes in diploid female embryos is regulated by the expression of Xist, a non-coding RNA  
483 that acts as a major effector on X-chromosome inactivation (XCI). The methylation of Xist prevents  
484 its expression and many have studied the potentially negative effects on development of  
485 parthenogenetic (Chen et al., 2019) and cloned (Zeng et al., 2016) mammalian embryos. On the  
486 other hand, the KCNQ1 imprinted domain is one of the largest known imprinted clusters, and its  
487 altered imprinting has been associated with fetal overgrowth or large offspring syndrome (LOS) (Lee  
488 et al., 1999; Chen et al., 2015). This region is regulated by the KvDMR1 located in the promoter of  
489 the non-coding KCNQ1OT1 gene which is maternally methylated. Kcnq1ot1 is paternally  
490 expressed and negatively regulate the expression of several maternally expressed genes, including  
491 CDKN1C, KCNQ1, and PHLDA2 (Ager et al., 2008). Thus, differential expression of X-linked  
492 and imprinted genes, can help to address the causes behind the limited in vitro developmental  
493 potential of haploid androgenotes. Our data revealed similar expression levels at the time of ZGA  
494 among groups, where only CDKN1C was upregulated in androgenotes compared to the other  
495 groups, indicating a differential alteration at time of ZGA in imprinted gene expression. At the  
496 morula stage, XIST was highly expressed in the hAE and the X-linked genes PGK1 and HPRT  
497 showed similar levels among groups. In cattle, the presence of XIST transcripts has been reported  
498 as early as the 2-cell stage (Mendonca et al., 2019). Microarray and RNA-seq analyses of bovine  
499 blastocysts demonstrated higher expression of X-linked genes in female compared with male  
500 embryos, indicating that dosage compensation initiates later (Bermejo-Alvarez et al., 2010; Min et  
501 al., 2017). A recent report has indicated that XIST accumulation and XCI in bovine embryos starts  
502 at the morula stage. However, XIST colocalization with repressive marks (H3 lysine 27  
503 trimethylation) on histones was only detected by day 7 blastocysts, indicating that complete XCI is  
504 only partially achieved at the blastocyst stage (Yu et al., 2020). Although *XIST* accumulation did  
505 not lead to globally reduced expression of X-linked genes, and X-Chr inactivation is only partially  
506 achieved at the blastocyst stage (Bermejo-Alvarez et al., 2010; Yu et al., 2020), the effects of the  
507 dysregulated expression of this long-noncoding RNA in haploid androgenetic morulas and  
508 blastocyst stages needs further investigation to clarify its impacts on chromosome-wide  
509 downregulation of gene expression. Latham et al. (2002) reported elevated expression of Xist RNA  
510 in haploid mouse androgenotes, and a similar pattern for the PGK1 gene, suggesting that haploid  
511 androgenotes may undergo deficient XCI, or that the embryos that initiate the XCI process begin  
512 to die soon thereafter. Haploid androgenotes with the greatest degree of Xist RNA expression,  
513 PGK1 gene repression, and repression of other X-linked genes may die within a narrow period of  
514 time just after ZGA, which is consistent with our findings that the majority of haploid androgenotes  
515 fail to progress to the morula and blastocyst stage.

516 To our knowledge, this is the first study analyzing the expression of genes that belonging to the  
517 KCNQ1 imprinted domain in haploid androgenetic mammalian embryos. By analogy with X  
518 inactivation in the mouse species, the KCNQ1OT1 is paternally expressed as early as two-cell stage  
519 and maintained throughout preimplantation development, but the ubiquitously imprinted genes  
520 KCNQ1 and CDKN1C are paternally repressed at the morula/blastocyst stage. By contrast,

521 placentally imprinted genes TSSC4 and CD81 show biallelic expression in the blastocyst (Umlauf  
522 et al., 2004; Lewis et al., 2006). In this study, the KCNQ1OT1 and PHLDA1 were overexpressed  
523 in haploid androgenetic morula stage embryos. Also, CDKN1C expression was unexpectedly  
524 upregulated in androgenotes compared to male diploid embryos. As discussed earlier, haploid  
525 androgenotes that were able to progress up to morula stage might have escaped from KCNQ1OT1-  
526 silencing or those with the greatest degree of imprinting repression arrested just after ZGA. Thus,  
527 the abnormal expression of the KCNQ1 imprinted domain could potentially affect the development  
528 and differentiation of haploid androgenetic early stage embryos. Finally, IGF2R and GNAS, two  
529 maternal imprinted genes (Jiang et al., 2015), showed similar expression levels, which suggests that  
530 their imprinting was relaxed, or as previously reported, the monoallelic expression in ruminants  
531 may not be required for most imprinted genes during early embryonic development (Cruz et al.,  
532 2008).

533 DNA cytosine methylation is one of the most important modifications in the epigenetic genome  
534 and plays essential roles in various cellular processes, including genomic imprinting, X  
535 chromosome inactivation, retrotransposon silencing, as well as regulation of gene expression and  
536 embryogenesis (Reik et al., 2001). The addition of methyl groups to cytosine residues is catalyzed  
537 by DNA methyltransferases (DNMT1 for maintenance and DNMT3A and DNMT3B for de novo  
538 methylation (Pablo J. Ross, 2018). Active DNA demethylation has been ascribed to TET activity  
539 (Iqbal et al., 2011). In cattle, the presence of DNMT3B has been reported as the major responsible  
540 for the control of methylation levels at advanced preimplantary stages (Pablo J. Ross, 2018).  
541 Besides, among the factors required for demethylation process, TET1 is the predominant expressed  
542 enzyme after zygote genome activation (Bakhtari and Ross, 2014). Our results indicate that haploid  
543 and biparental embryos had similar levels of DNMT1 and TET1 transcripts. The zygotically  
544 expressed form of DNMT1 maintains the methylation of imprints at each cell cycle during early  
545 embryonic development (Hirasawa et al., 2008; Kurihara et al., 2008), suggesting that hAE are able  
546 to maintain their methylation imprints. Conversely, DNMT3B was deficient in both haploid groups.  
547 In accordance with our results, a previous study in mice demonstrated that the production and  
548 derivation of androgenetic haploid ESCs were severely impaired when *Dnmt3b* was deficient (He  
549 et al., 2018), suggesting that proper *Dnmt3b* activity and the content of methylation is essential for  
550 the development of mammalian haploid androgenetic embryos. Moreover, embryogenesis is  
551 severely impaired when *Dnmt3b* homozygous deletion (Okano et al., 1999). In mouse embryos, the  
552 inactivation of *Dnmt3b* induces a partial global hypomethylation, and even though the catalytic  
553 activities of DNMT3b and DNMT3a can compensate for each other, DNMT3B makes a greater  
554 contribution to the methylome, specifically in a set of CpG-dense sequences associated with  
555 pluripotency and developmental imprinted genes (Kato et al., 2007; Auclair et al., 2014). In  
556 addition, DNMT3B also has specific roles in the methylation of many CpG islands on autosomes  
557 and the inactive X chromosome that are dramatically hypomethylated in *Dnmt3b* KO embryo  
558 (Auclair et al., 2014). Nonetheless, it remains unknown whether bovine haploid androgenetic  
559 embryos undergo global hypomethylation.

560 Finally, we performed a gene specific bisulfite sequencing in order to analyze whether DMR  
561 methylation patterns were related to the high expression of XIST and KCNQ1OT1. As for the XIST  
562 DMR, all groups were demethylated, which is in accordance with its biallelic expression at during  
563 the early stages of bovine embryogenesis (Bermejo-Alvarez et al., 2010; Yu et al., 2020). In bovine  
564 sperm cells, the *XIST* gene does not appear methylated (Mendonca et al., 2019), suggesting  
565 that *XIST* would be expressed in androgenetic cells. It is likely that the XIST DMR undergoes  
566 methylation later during embryonic development, as the onset of XCI initiates at blastocyst stage  
567 (Yu et al., 2020). As for the KCNQ1 DMR, embryos carrying a maternal allele (biparental and  
568 parthenogenetic embryos) were beyond 60% methylated. However, since embryos from the haploid  
569 androgenetic group were demethylated and resembled the imprinted profile observed in the sperm  
570 (Robbins et al., 2012), if such hypomethylation is associated or it is in part responsible for the  
571 altered gene expression of the KCNQ1OT1 gene, needs to be further investigated.

572 In conclusion, this study has shown that micromanipulation effects and chromosomal abnormalities  
573 are not main factors affecting the development of bovine hAE. On the other hand, we show that the  
574 failure of haploid androgenetic bovine embryos to develop to the blastocyst stage is associated with  
575 abnormal expression of key factors involved in DNA methylation, XCI and genomic imprinting,  
576 suggesting that their early developmental constraint is regulated at an epigenetic level. In order to  
577 obtain a better understanding of epigenetic regulation in the mammalian haploid androgenetic  
578 model, future studies will be aimed at a more in-depth analysis of the global epigenetic features.  
579 This will involve investigation by global transcriptomic and methylation analysis as well the study  
580 of repressive epigenetics marks in haploid embryos.

581

## 582 **Conflict of Interest**

583 *The authors declare that the research was conducted in the absence of any commercial or financial*  
584 *relationships that could be construed as a potential conflict of interest.*

## 585 **Author Contributions**

586 LA, JT, and LS contributed to conception and design of the study. JS, MG and AG contributed with  
587 experimental procedures. LA, JT and LS wrote the manuscript. All authors contributed to  
588 manuscript revision, read, and approved the submitted version.

## 589 **Funding**

590 This work was funded by a grant from NSERC-Canada with Boviteq inc. (CRDPJ 536636-18 and  
591 CRDPJ 487107-45 to LCS) and a scholarship by the National Agency for Research and  
592 Development (ANID)/Scholarship Program/POSTDOCTORADO BECAS CHILE/2017 –  
593 74180059 (LA).  
594

## 595 **Acknowledgments**

596

## References

597

598 Ager, E.I., Pask, A.J., Gehring, H.M., Shaw, G., and Renfree, M.B. (2008). Evolution of the  
599 CDKN1C-KCNQ1 imprinted domain. *BMC Evol Biol* 8, 163. doi: 10.1186/1471-2148-8-  
600 1631471-2148-8-163 [pii].

601 Aguilera, L., Felmer, R., Arias, M.E., Navarrete, F., Martin-Hidalgo, D., Lee, H.C., et al. (2017).  
602 Defective sperm head decondensation undermines the success of ICSI in the bovine.  
603 *Reproduction* 154(3), 307-318. doi: 10.1530/REP-17-0270REP-17-0270 [pii].

604 Alikani, M., Calderon, G., Tomkin, G., Garrisi, J., Kokot, M., and Cohen, J. (2000). Cleavage  
605 anomalies in early human embryos and survival after prolonged culture in-vitro. *Hum*  
606 *Reprod* 15(12), 2634-2643. doi: 10.1093/humrep/15.12.2634.

607 Arias, M.E., Risopatron, J., Sanchez, R., and Felmer, R. (2015). Intracytoplasmic sperm injection  
608 affects embryo developmental potential and gene expression in cattle. *Reprod Biol* 15(1),  
609 34-41. doi: 10.1016/j.repbio.2014.11.001S1642-431X(14)00097-7 [pii].

610 Auclair, G., Guibert, S., Bender, A., and Weber, M. (2014). Ontogeny of CpG island methylation  
611 and specificity of DNMT3 methyltransferases during embryonic development in the mouse.  
612 *Genome Biol* 15(12), 545. doi: 10.1186/s13059-014-0545-5.

- 613 Babariya, D., Fragouli, E., Alfarawati, S., Spath, K., and Wells, D. (2017). The incidence and origin  
614 of segmental aneuploidy in human oocytes and preimplantation embryos. *Hum Reprod*  
615 32(12), 2549-2560. doi: 10.1093/humrep/dex324.
- 616 Bai, M., Han, Y., Wu, Y., Liao, J., Li, L., Wang, L., et al. (2019). Targeted genetic screening in  
617 mice through haploid embryonic stem cells identifies critical genes in bone development.  
618 *PLoS Biol* 17(7), e3000350. doi: 10.1371/journal.pbio.3000350PBIOLGY-D-19-00315  
619 [pii].
- 620 Bai, M., Wu, Y., and Li, J. (2016). Generation and application of mammalian haploid embryonic  
621 stem cells. *J Intern Med* 280(3), 236-245. doi: 10.1111/joim.12503.
- 622 Bakhtari, A., and Ross, P.J. (2014). DPPA3 prevents cytosine hydroxymethylation of the maternal  
623 pronucleus and is required for normal development in bovine embryos. *Epigenetics* 9(9),  
624 1271-1279. doi: 10.4161/epi.32087.
- 625 Bermejo-Alvarez, P., Rizos, D., Rath, D., Lonergan, P., and Gutierrez-Adan, A. (2010). Sex  
626 determines the expression level of one third of the actively expressed genes in bovine  
627 blastocysts. *Proc Natl Acad Sci U S A* 107(8), 3394-3399. doi: 10.1073/pnas.0913843107.
- 628 Bordignon, V., and Smith, L.C. (1998). Telophase enucleation: an improved method to prepare  
629 recipient cytoplasts for use in bovine nuclear transfer. *Mol Reprod Dev* 49(1), 29-36. doi:  
630 10.1002/(SICI)1098-2795(199801)49:1<29::AID-MRD4>3.0.CO;2-Q.
- 631 Chen, H., Sun, M., Liu, J., Tong, C., and Meng, T. (2015). Silencing of Paternally Expressed Gene  
632 10 Inhibits Trophoblast Proliferation and Invasion. *PLoS One* 10(12), e0144845. doi:  
633 10.1371/journal.pone.0144845PONE-D-15-29672 [pii].
- 634 Chen, X., Zhu, Z., Yu, F., Huang, J., Jia, R., and Pan, J. (2019). Effect of shRNA-mediated Xist  
635 knockdown on the quality of porcine parthenogenetic embryos. *Dev Dyn* 248(1), 140-148.  
636 doi: 10.1002/dvdy.24660.
- 637 Coy, P., Romar, R., Payton, R.R., McCann, L., Saxton, A.M., and Edwards, J.L. (2005).  
638 Maintenance of meiotic arrest in bovine oocytes using the S-enantiomer of roscovitine:  
639 effects on maturation, fertilization and subsequent embryo development in vitro.  
640 *Reproduction* 129(1), 19-26. doi: 129/1/19 [pii]10.1530/rep.1.00299.
- 641 Cruz, N.T., Wilson, K.J., Cooney, M.A., Tecirlioglu, R.T., Lagutina, I., Galli, C., et al. (2008).  
642 Putative imprinted gene expression in uniparental bovine embryo models. *Reprod Fertil*  
643 *Dev* 20(5), 589-597. doi: RD08024 [pii].
- 644 Hardy, K., Winston, R.M., and Handyside, A.H. (1993). Binucleate blastomeres in preimplantation  
645 human embryos in vitro: failure of cytokinesis during early cleavage. *J Reprod Fertil* 98(2),  
646 549-558. doi: 10.1530/jrf.0.0980549.
- 647 He, W., Zhang, X., Zhang, Y., Zheng, W., Xiong, Z., Hu, X., et al. (2018). Reduced Self-  
648 Diploidization and Improved Survival of Semi-cloned Mice Produced from Androgenetic  
649 Haploid Embryonic Stem Cells through Overexpression of Dnmt3b. *Stem Cell Reports*  
650 10(2), 477-493. doi: 10.1016/j.stemcr.2017.12.024.
- 651 Hirasawa, R., Chiba, H., Kaneda, M., Tajima, S., Li, E., Jaenisch, R., et al. (2008). Maternal and  
652 zygotic Dnmt1 are necessary and sufficient for the maintenance of DNA methylation  
653 imprints during preimplantation development. *Genes Dev* 22(12), 1607-1616. doi:  
654 10.1101/gad.1667008.
- 655 Horiuchi, T., Emuta, C., Yamauchi, Y., Oikawa, T., Numabe, T., and Yanagimachi, R. (2002). Birth  
656 of normal calves after intracytoplasmic sperm injection of bovine oocytes: a methodological  
657 approach. *Theriogenology* 57(3), 1013-1024.
- 658 Hu, M., TuanMu, L.C., Wei, H., Gao, F., Li, L., and Zhang, S. (2015a). Development and imprinted  
659 gene expression in uniparental preimplantation mouse embryos in vitro. *Mol Biol Rep* 42(2),  
660 345-353. doi: 10.1007/s11033-014-3774-5.
- 661 Hu, M., Zhao, Z., TuanMu, L.C., Wei, H., Gao, F., Li, L., et al. (2015b). Analysis of imprinted gene  
662 expression and implantation in haploid androgenetic mouse embryos. *Andrologia* 47(1),  
663 102-108. doi: 10.1111/and.12222.

- 664 Iqbal, K., Jin, S.G., Pfeifer, G.P., and Szabo, P.E. (2011). Reprogramming of the paternal genome  
665 upon fertilization involves genome-wide oxidation of 5-methylcytosine. *Proc Natl Acad Sci*  
666 *U S A* 108(9), 3642-3647. doi: 10.1073/pnas.1014033108.
- 667 Jiang, Z., Dong, H., Zheng, X., Marjani, S.L., Donovan, D.M., Chen, J., et al. (2015). mRNA Levels  
668 of Imprinted Genes in Bovine In Vivo Oocytes, Embryos and Cross Species Comparisons  
669 with Humans, Mice and Pigs. *Sci Rep* 5, 17898. doi: 10.1038/srep17898srep17898 [pii].
- 670 Kato, Y., Kaneda, M., Hata, K., Kumaki, K., Hisano, M., Kohara, Y., et al. (2007). Role of the  
671 Dnmt3 family in de novo methylation of imprinted and repetitive sequences during male  
672 germ cell development in the mouse. *Hum Mol Genet* 16(19), 2272-2280. doi:  
673 10.1093/hmg/ddm179.
- 674 Kawarsky, S.J., Basrur, P.K., Stubbings, R.B., Hansen, P.J., and King, W.A. (1996). Chromosomal  
675 abnormalities in bovine embryos and their influence on development. *Biol Reprod* 54(1),  
676 53-59. doi: 10.1095/biolreprod54.1.53.
- 677 Kokubu, C., and Takeda, J. (2014). When half is better than the whole: advances in haploid  
678 embryonic stem cell technology. *Cell Stem Cell* 14(3), 265-267. doi:  
679 10.1016/j.stem.2014.02.001S1934-5909(14)00052-6 [pii].
- 680 Kong, X., Yang, S., Gong, F., Lu, C., Zhang, S., Lu, G., et al. (2016). The Relationship between  
681 Cell Number, Division Behavior and Developmental Potential of Cleavage Stage Human  
682 Embryos: A Time-Lapse Study. *PLoS One* 11(4), e0153697. doi:  
683 10.1371/journal.pone.0153697.
- 684 Kono, T., Sotomaru, Y., Sato, Y., and Nakahara, T. (1993). Development of androgenetic mouse  
685 embryos produced by in vitro fertilization of enucleated oocytes. *Mol Reprod Dev* 34(1),  
686 43-46. doi: 10.1002/mrd.1080340107.
- 687 Kurihara, Y., Kawamura, Y., Uchijima, Y., Amamo, T., Kobayashi, H., Asano, T., et al. (2008).  
688 Maintenance of genomic methylation patterns during preimplantation development requires  
689 the somatic form of DNA methyltransferase 1. *Dev Biol* 313(1), 335-346. doi:  
690 10.1016/j.ydbio.2007.10.033.
- 691 Kuznyetsov, V., Kuznyetsova, I., Chmura, M., and Verlinsky, Y. (2007). Duplication of the sperm  
692 genome by human androgenetic embryo production: towards testing the paternal genome  
693 prior to fertilization. *Reprod Biomed Online* 14(4), 504-514. doi: S1472-6483(10)60900-5  
694 [pii].
- 695 Lafontaine, S., Labrecque, R., Palomino, J.M., Blondin, P., and Sirard, M.A. (2020). Specific  
696 imprinted genes demethylation in association with oocyte donor's age and culture conditions  
697 in bovine embryos assessed at day 7 and 12 post insemination. *Theriogenology* 158, 321-  
698 330. doi: 10.1016/j.theriogenology.2020.09.027.
- 699 Lagutina, I., Lazzari, G., Duchi, R., and Galli, C. (2004). Developmental potential of bovine  
700 androgenetic and parthenogenetic embryos: a comparative study. *Biol Reprod* 70(2), 400-  
701 405. doi: 10.1095/biolreprod.103.021972biolreprod.103.021972 [pii].
- 702 Landry, D.A., Bellefleur, A.M., Labrecque, R., Grand, F.X., Vigneault, C., Blondin, P., et al.  
703 (2016). Effect of cow age on the in vitro developmental competence of oocytes obtained  
704 after FSH stimulation and coasting treatments. *Theriogenology* 86(5), 1240-1246. doi:  
705 10.1016/j.theriogenology.2016.04.064.
- 706 Latham, K.E., Akutsu, H., Patel, B., and Yanagimachi, R. (2002). Comparison of gene expression  
707 during preimplantation development between diploid and haploid mouse embryos. *Biol*  
708 *Reprod* 67(2), 386-392. doi: 10.1095/biolreprod67.2.386.
- 709 Latham, K.E., Patel, B., Bautista, F.D., and Hawes, S.M. (2000). Effects of X chromosome number  
710 and parental origin on X-linked gene expression in preimplantation mouse embryos. *Biol*  
711 *Reprod* 63(1), 64-73. doi: 10.1095/biolreprod63.1.64.
- 712 Lee, J.H., and Campbell, K.H. (2006). Effects of enucleation and caffeine on maturation-promoting  
713 factor (MPF) and mitogen-activated protein kinase (MAPK) activities in ovine oocytes used

- 714 as recipient cytoplasts for nuclear transfer. *Biol Reprod* 74(4), 691-698. doi:  
715 10.1095/biolreprod.105.043885.
- 716 Lee, M.P., DeBaun, M.R., Mitsuya, K., Galonek, H.L., Brandenburg, S., Oshimura, M., et al.  
717 (1999). Loss of imprinting of a paternally expressed transcript, with antisense orientation to  
718 KVLQT1, occurs frequently in Beckwith-Wiedemann syndrome and is independent of  
719 insulin-like growth factor II imprinting. *Proc Natl Acad Sci U S A* 96(9), 5203-5208. doi:  
720 10.1073/pnas.96.9.5203.
- 721 Leeb, M., and Wutz, A. (2011). Derivation of haploid embryonic stem cells from mouse embryos.  
722 *Nature* 479(7371), 131-134. doi: 10.1038/nature10448 [pii].
- 723 Lewis, A., Green, K., Dawson, C., Redrup, L., Huynh, K.D., Lee, J.T., et al. (2006). Epigenetic  
724 dynamics of the *Kcnq1* imprinted domain in the early embryo. *Development* 133(21), 4203-  
725 4210. doi: dev.02612 [pii]10.1242/dev.02612.
- 726 Li, W., Shuai, L., Wan, H., Dong, M., Wang, M., Sang, L., et al. (2012). Androgenetic haploid  
727 embryonic stem cells produce live transgenic mice. *Nature* 490(7420), 407-411. doi:  
728 10.1038/nature11435.
- 729 Long, C.R., Pinto-Correia, C., Duby, R.T., Ponce de Leon, F.A., Boland, M.P., Roche, J.F., et al.  
730 (1993). Chromatin and microtubule morphology during the first cell cycle in bovine  
731 zygotes. *Mol Reprod Dev* 36(1), 23-32. doi: 10.1002/mrd.1080360105.
- 732 Malcuit, C., Maserati, M., Takahashi, Y., Page, R., and Fissore, R.A. (2006). Intracytoplasmic  
733 sperm injection in the bovine induces abnormal  $[Ca^{2+}]_i$  responses and oocyte activation.  
734 *Reprod Fertil Dev* 18(1-2), 39-51. doi: RD05131 [pii].
- 735 Matsukawa, K., Turco, M.Y., Scapolo, P.A., Reynolds, L., Ptak, G., and Loi, P. (2007).  
736 Development of sheep androgenetic embryos is boosted following transfer of male  
737 pronuclei into androgenetic hemizygotes. *Cloning Stem Cells* 9(3), 374-381. doi:  
738 10.1089/clo.2006.0016.
- 739 Mendonca, A.D.S., Silveira, M.M., Rios, A.F.L., Mangiavacchi, P.M., Caetano, A.R., Dode,  
740 M.A.N., et al. (2019). DNA methylation and functional characterization of the *XIST* gene  
741 during in vitro early embryo development in cattle. *Epigenetics* 14(6), 568-588. doi:  
742 10.1080/15592294.2019.1600828.
- 743 Min, B., Park, J.S., Jeon, K., and Kang, Y.K. (2017). Characterization of X-Chromosome Gene  
744 Expression in Bovine Blastocysts Derived by In vitro Fertilization and Somatic Cell Nuclear  
745 Transfer. *Front Genet* 8, 42. doi: 10.3389/fgene.2017.00042.
- 746 Navara, C.S., First, N.L., and Schatten, G. (1994). Microtubule organization in the cow during  
747 fertilization, polyspermy, parthenogenesis, and nuclear transfer: the role of the sperm aster.  
748 *Dev Biol* 162(1), 29-40. doi: 10.1006/dbio.1994.1064.
- 749 Navara, C.S., First, N.L., and Schatten, G. (1996). Phenotypic variations among paternal  
750 centrosomes expressed within the zygote as disparate microtubule lengths and sperm aster  
751 organization: correlations between centrosome activity and developmental success. *Proc*  
752 *Natl Acad Sci U S A* 93(11), 5384-5388. doi: 10.1073/pnas.93.11.5384.
- 753 Navara, C.S., Simerly, C., Zoran, S., and Schatten, G. (1995). The sperm centrosome during  
754 fertilization in mammals: implications for fertility and reproduction. *Reprod Fertil Dev* 7(4),  
755 747-754. doi: 10.1071/rd9950747.
- 756 Ock, S.A., Bhak, J.S., Balasubramanian, S., Lee, H.J., Choe, S.Y., and Rho, G.J. (2003). Different  
757 activation treatments for successful development of bovine oocytes following  
758 intracytoplasmic sperm injection. *Zygote* 11(1), 69-76.
- 759 Okano, M., Bell, D.W., Haber, D.A., and Li, E. (1999). DNA methyltransferases *Dnmt3a* and  
760 *Dnmt3b* are essential for de novo methylation and mammalian development. *Cell* 99(3),  
761 247-257. doi: 10.1016/s0092-8674(00)81656-6.
- 762 Pablo J. Ross, R.V.S. (2018). Epigenetic remodeling in preimplantation embryos: Cows are not big  
763 mice. *Anim Reprod* 15,n3, 204-214. doi: 10.21451/1984-3143-AR2018-0068



- 764 Panneerdoss, S., Siva, A.B., Kameshwari, D.B., Rangaraj, N., and Shivaji, S. (2012). Association  
765 of lactate, intracellular pH, and intracellular calcium during capacitation and acrosome  
766 reaction: contribution of hamster sperm dihydrolipoamide dehydrogenase, the E3 subunit  
767 of pyruvate dehydrogenase complex. *J Androl* 33(4), 699-710. doi: jandrol.111.013151  
768 [pii]10.2164/jandrol.111.013151.
- 769 Park, C.H., Kim, H.S., Lee, S.G., and Lee, C.K. (2009). Methylation status of differentially  
770 methylated regions at Igf2/H19 locus in porcine gametes and preimplantation embryos.  
771 *Genomics* 93(2), 179-186. doi: 10.1016/j.ygeno.2008.10.002S0888-7543(08)00250-4 [pii].
- 772 Pelinck, M.J., De Vos, M., Dekens, M., Van der Elst, J., De Sutter, P., and Dhont, M. (1998).  
773 Embryos cultured in vitro with multinucleated blastomeres have poor implantation potential  
774 in human in-vitro fertilization and intracytoplasmic sperm injection. *Hum Reprod* 13(4),  
775 960-963. doi: 10.1093/humrep/13.4.960.
- 776 Pfaffl, M.W., Horgan, G.W., and Dempfle, L. (2002). Relative expression software tool (REST)  
777 for group-wise comparison and statistical analysis of relative expression results in real-time  
778 PCR. *Nucleic Acids Res* 30(9), e36.
- 779 Reik, W., Dean, W., and Walter, J. (2001). Epigenetic reprogramming in mammalian development.  
780 *Science* 293(5532), 1089-1093. doi: 10.1126/science.1063443.
- 781 Rho, G.J., Kawarsky, S., Johnson, W.H., Kochhar, K., and Betteridge, K.J. (1998). Sperm and  
782 oocyte treatments to improve the formation of male and female pronuclei and subsequent  
783 development following intracytoplasmic sperm injection into bovine oocytes. *Biol Reprod*  
784 59(4), 918-924.
- 785 Robbins, K.M., Chen, Z., Wells, K.D., and Rivera, R.M. (2012). Expression of KCNQ1OT1,  
786 CDKN1C, H19, and PLAGL1 and the methylation patterns at the KvDMR1 and H19/IGF2  
787 imprinting control regions is conserved between human and bovine. *J Biomed Sci* 19, 95.  
788 doi: 10.1186/1423-0127-19-95.
- 789 Roh, S., Hwang, W., Lee, B., Lim, J., and Lee, E. (2002). Improved monospermic fertilization and  
790 subsequent blastocyst formation of bovine oocytes fertilized in vitro in a medium containing  
791 NaCl of decreased concentration. *J Vet Med Sci* 64(8), 667-671. doi: 10.1292/jvms.64.667.
- 792 Ross, P.J., Beyhan, Z., Iager, A.E., Yoon, S.Y., Malcuit, C., Schellander, K., et al. (2008).  
793 Parthenogenetic activation of bovine oocytes using bovine and murine phospholipase C  
794 zeta. *BMC Dev Biol* 8, 16. doi: 10.1186/1471-213X-8-161471-213X-8-16 [pii].
- 795 Rubio, C., Simon, C., Vidal, F., Rodrigo, L., Pehlivan, T., Remohi, J., et al. (2003). Chromosomal  
796 abnormalities and embryo development in recurrent miscarriage couples. *Hum Reprod*  
797 18(1), 182-188. doi: 10.1093/humrep/deg015.
- 798 Sagi, I., De Pinho, J.C., Zuccaro, M.V., Atzmon, C., Golan-Lev, T., Yanuka, O., et al. (2019).  
799 Distinct Imprinting Signatures and Biased Differentiation of Human Androgenetic and  
800 Parthenogenetic Embryonic Stem Cells. *Cell Stem Cell* 25(3), 419-432 e419. doi:  
801 10.1016/j.stem.2019.06.013.
- 802 Sagirkaya, H., Misirlioglu, M., Kaya, A., First, N.L., Parrish, J.J., and Memili, E. (2006).  
803 Developmental and molecular correlates of bovine preimplantation embryos. *Reproduction*  
804 131(5), 895-904. doi: 131/5/895 [pii]10.1530/rep.1.01021.
- 805 Sharpe, J.C., and Evans, K.M. (2009). Advances in flow cytometry for sperm sexing.  
806 *Theriogenology* 71(1), 4-10. doi: 10.1016/j.theriogenology.2008.09.021.
- 807 Shuai, L., and Zhou, Q. (2014). Haploid embryonic stem cells serve as a new tool for mammalian  
808 genetic study. *Stem Cell Res Ther* 5(1), 20. doi: 10.1186/scrt409.
- 809 Sutovsky, P., Hewitson, L., Simerly, C., and Schatten, G. (1996a). Molecular medical approaches  
810 for alleviating infertility and understanding assisted reproductive technologies. *Proc Assoc*  
811 *Am Physicians* 108(6), 432-443.
- 812 Sutovsky, P., Hewitson, L., Simerly, C.R., Tengowski, M.W., Navara, C.S., Haavisto, A., et al.  
813 (1996b). Intracytoplasmic sperm injection for Rhesus monkey fertilization results in

- 814 unusual chromatin, cytoskeletal, and membrane events, but eventually leads to pronuclear  
815 development and sperm aster assembly. *Hum Reprod* 11(8), 1703-1712. doi:  
816 10.1093/oxfordjournals.humrep.a019473.
- 817 Tarkowski, A.K., and Rossant, J. (1976). Haploid mouse blastocysts developed from bisected  
818 zygotes. *Nature* 259(5545), 663-665. doi: 10.1038/259663a0.
- 819 Umlauf, D., Goto, Y., Cao, R., Cerqueira, F., Wagschal, A., Zhang, Y., et al. (2004). Imprinting  
820 along the *Kcnq1* domain on mouse chromosome 7 involves repressive histone methylation  
821 and recruitment of Polycomb group complexes. *Nat Genet* 36(12), 1296-1300. doi: ng1467  
822 [pii]10.1038/ng1467.
- 823 Vichera, G., Olivera, R., Sipowicz, P., Radrizzani, M., and Salamone, D. (2011). Sperm genome  
824 cloning used in biparental bovine embryo reconstruction. *Reprod Fertil Dev* 23(6), 769-779.  
825 doi: 10.1071/RD10252RD10252 [pii].
- 826 Winger, Q.A., De La Fuente, R., King, W.A., Armstrong, D.T., and Watson, A.J. (1997). Bovine  
827 parthenogenesis is characterized by abnormal chromosomal complements: implications for  
828 maternal and paternal co-dependence during early bovine development. *Dev Genet* 21(2),  
829 160-166. doi: 10.1002/(SICI)1520-6408(1997)21:2<160::AID-DVG5>3.0.CO;2-5  
830 [pii]10.1002/(SICI)1520-6408(1997)21:2<160::AID-DVG5>3.0.CO;2-5.
- 831 Yang, H., Liu, Z., Ma, Y., Zhong, C., Yin, Q., Zhou, C., et al. (2013). Generation of haploid  
832 embryonic stem cells from *Macaca fascicularis* monkey parthenotes. *Cell Res* 23(10), 1187-  
833 1200. doi: 10.1038/cr.2013.93cr201393 [pii].
- 834 Yang, H., Shi, L., Wang, B.A., Liang, D., Zhong, C., Liu, W., et al. (2012). Generation of  
835 genetically modified mice by oocyte injection of androgenetic haploid embryonic stem  
836 cells. *Cell* 149(3), 605-617. doi: 10.1016/j.cell.2012.04.002S0092-8674(12)00421-7 [pii].
- 837 Yu, B., van Tol, H.T.A., Stout, T.A.E., and Roelen, B.A.J. (2020). Initiation of X Chromosome  
838 Inactivation during Bovine Embryo Development. *Cells* 9(4). doi: 10.3390/cells9041016.
- 839 Zeng, F., Huang, Z., Yuan, Y., Shi, J., Cai, G., Liu, D., et al. (2016). Effects of RNAi-mediated  
840 knockdown of *Xist* on the developmental efficiency of cloned male porcine embryos. *J*  
841 *Reprod Dev* 62(6), 591-597. doi: 10.1262/jrd.2016-095.
- 842 Zhong, C., Zhang, M., Yin, Q., Zhao, H., Wang, Y., Huang, S., et al. (2016). Generation of human  
843 haploid embryonic stem cells from parthenogenetic embryos obtained by microsurgical  
844 removal of male pronucleus. *Cell Res* 26(6), 743-746. doi: 10.1038/cr.2016.59.
- 845  
846  
847  
848  
849  
850  
851  
852  
853  
854  
855  
856  
857  
858  
859  
860  
861  
862

863  
864  
865  
866  
867  
868  
869  
870  
  
871  
872  
873  
874  
875  
876  
877  
878  
879  
880  
881  
882  
883  
884  
885  
886  
887  
888  
889  
890  
891  
892  
893  
894  
895  
896  
897  
898  
899  
900  
901  
902  
903  
904

Table 1 – Development to cleavage and blastocyst stages at Day 2 (48 h) and Day 7 (168 h) post insemination (hpi) of control and putative androgenetic embryos manipulated both before (pre-IVF) and after (post-IVF) in vitro fertilization (IVF).

| Groups                           | No. oocytes | Embryo development |     |                       |       |
|----------------------------------|-------------|--------------------|-----|-----------------------|-------|
|                                  |             | Cleaved %          |     | Blastocyst %<br>day 7 |       |
| Control denudation 6h after IVF  | 126         | 91                 | 72% | 35                    | 28%   |
| Haploid enucleated after IVF     | 186         | 149                | 80% | 20                    | 11%   |
| Control denudation 2h before IVF | 148         | 112                | 76% | 45                    | 30%   |
| Haploid enucleated before IVF    | 240         | 160                | 67% | 4                     | 2%*** |

Control denudation 6h after IVF: oocytes denuded 6 h after insemination. Haploid enucleated after IVF: oocytes denuded and enucleated at 6 h after insemination. Control denudation 2h before IVF: oocytes denuded at 2 h before insemination. Haploid enucleated before IVF: oocytes denuded and enucleated at 2 h before insemination. Asterisks denote significant differences within columns ( $p < 0.05$ ).

905  
906  
907  
908  
909  
910  
  
911  
912  
913  
914  
915  
916  
917  
918  
919  
920  
921  
922  
923  
924  
925  
926  
927  
928  
929  
930  
931  
932  
933  
934  
935  
936  
937  
938  
939  
940  
941  
942  
943  
944  
945

Table 2. Formation of pronuclei of zygotes fixed at 20 h after insemination in control and enucleated oocytes manipulated either before or after insemination.

| Group                         | Oocytes (n) | Pronuclear Formation 20 hpi (No. and %) |           |        |        |          |          |                 |
|-------------------------------|-------------|-----------------------------------------|-----------|--------|--------|----------|----------|-----------------|
|                               |             | 1 PB                                    |           |        | Others |          |          |                 |
|                               |             | 1 PN                                    | 2 PN      | PDSH   | CSH    | ≥ 3 PN   | 0 PN     | *Multinucleated |
| Control denuded 6h after IVF  | 64 (3)      | 0 (0%)                                  | 44 (69%)* | 0 (0%) | 0 (0%) | 14 (22%) | 6 (9%)   | 14 (22%)        |
| Haploid enucleated after IVF  | 80 (3)      | 43 (54%)*                               | 6 (8%)    | 0 (0%) | 0 (0%) | 21 (25%) | 10 (13%) | 27 (34%)        |
| Control denuded 2h before     | 10 (2)      | 0 (0%)                                  | 8 (80%)*  | 0 (0%) | 0 (0%) | 1 (10%)  | 1 (10%)  | 1 (10%)         |
| Haploid enucleated before IVF | 12 (2)      | 9 (75%)*                                | 0 (0%)    | 0 (0%) | 0 (0%) | 2 (17%)  | 1 (8%)   | 2 (17%)         |

PB: polar body; PN = pronuclei; PDSH = partially decondensed sperm head; CSH = condensed sperm head. Control denudation 6h after IVF: oocytes denuded 6 h after insemination. Haploid enucleated after IVF: oocytes denuded and enucleated at 6 h after insemination. Control denudation 2h before IVF: oocytes denuded at 2 h before insemination. Haploid enucleated before IVF: oocytes denuded and enucleated at 2 h before insemination. \*Multinucleated: multinucleated zygote was assumed as the presence of more than one pronucleus in enucleated and more than 2 pronuclei in control zygotes. Asterisks denote significant differences within columns (p<0.05).

946  
947  
948 Table 3. Formation of pronuclei and other chromatin structures in diploid (ICSI) and haploid  
949 zygotes (parthenogenetic and androgenetic) observed at 20 h after activation.

| Group             | Oocytes (n) | Pronuclear Formation 20 hpi (No. and %) |           |            |            |          |        |                 |
|-------------------|-------------|-----------------------------------------|-----------|------------|------------|----------|--------|-----------------|
|                   |             | 1 PB                                    |           |            | Others     |          |        |                 |
|                   |             | 1 PN                                    | 2 PN      | PDSH       | CSH        | ≥ 3 PN   | 0 PN   | *Multinucleated |
| ICSI (biparental) | 23 (2)      | 0 (0%)                                  | 18 (78%)* | 1 (4%)*    | 4 (17%)*   | 0 (0%)*  | 0 (0%) | 0 (0%)          |
| Haploid partheno  | 35 (3)      | 30 (86%)*                               | 0 (0%)    | 0 (0%)     | 0 (0%)     | 5 (14%)  | 0 (0%) | 5 (14%)**       |
| Haploid androgeno | 92 (7)      | 59 (64%)*                               | 0 (0%)    | 12 (13%)** | 20 (22%)** | 1 (1%)** | 0 (0%) | 1 (1%)          |

950 PB: polar body; PN = pronuclei; PDSH = partially decondensed sperm head; CSH = condensed  
951 sperm head. Asterisks denote significant differences within columns ( $p < 0.05$ ). Control denudation  
952 6h after IVF: oocytes denuded 6 h after insemination. Haploid enucleated after IVF: oocytes  
953 denuded and enucleated at 6 h after insemination. Control denudation 2h before IVF: oocytes  
954 denuded at 2 h before insemination. Haploid enucleated before IVF: oocytes denuded and  
955 enucleated at 2 h before insemination. \*Multinucleated: multinucleated zygote was assumed as the  
956 presence of more than one pronucleus in enucleated and more than 2 pronuclei in control zygotes.  
957 Asterisks denote significant differences within columns ( $p < 0.05$ ).

958  
959  
960  
961  
962  
963  
964  
965  
966  
967  
968  
969  
970  
971  
972  
973  
974  
975  
976  
977  
978  
979  
980  
981  
982  
983  
984  
985  
986

987 Table 4. Development to cleavage (Day-2) and blastocyst (Day-7) stages of embryos produced by  
 988 in vitro fertilization (IVF), intracytoplasmic sperm injection (ICSI) using non-sexed and sexed  
 989 sperm, haploid parthenogenetic and androgenesis using sexed spermatozoa.

| Group              | Oocytes<br>(n) |      | Cleaved<br>embryos 48<br>hpi (%) |       | Embryo development |      |                       |        |                       |
|--------------------|----------------|------|----------------------------------|-------|--------------------|------|-----------------------|--------|-----------------------|
|                    |                |      |                                  |       | Morulas/<br>oocyte |      | Blastocyst/<br>oocyte |        | Blastocyst/<br>morula |
| IVF                | 164            | (10) | 148                              | 90%** | 59                 | 36%  | 48                    | 29%    | 81%                   |
| ICSI X-carrying    | 260            | (16) | 187                              | 72%   | 80                 | 31%  | 68                    | 26%    | 85%                   |
| ICSI Y-carrying    | 189            | (5)  | 122                              | 65%   | 50                 | 26%  | 45                    | 24%    | 90%                   |
| Haploid parthenote | 354            | (16) | 261                              | 74%   | 84                 | 24%  | 57                    | 16%*   | 68%**                 |
| Haploid andro-X    | 359            | (17) | 262                              | 73%   | 34                 | 9%** | 9                     | 3%**** | 26%****               |
| Haploid andro-Y    | 146            | (5)  | 103                              | 71%   | n.a                | n.a  | n.a                   | n.a    | na                    |

990 ICSI: intracytoplasmic sperm injection using non-sexed sperm. ICSI X-carrying: intracytoplasmic  
 991 sperm injection using X-chromosome sexed sperm. Haploid andro-X: haploid androgenetic  
 992 embryos generated using X-chromosome sexed sperm. Haploid andro-Y: haploid androgenetic  
 993 embryos generated using Y-chromosome sexed sperm n.a. data is not available. Asterisks denote  
 994 significant differences within columns (\*p<0.05; \*\*p<0.005, \*\*\*\*p<0.0001).

995  
996  
997  
998  
999  
1000  
1001  
1002  
1003  
1004  
1005  
1006  
1007  
1008  
1009  
1010  
1011  
1012  
1013  
1014  
1015  
1016  
1017  
1018  
1019  
1020  
1021  
1022  
1023  
1024  
1025  
1026

1027 Table 5. Chromosomal composition of bovine biparental diploid ICSI and haploid uniparental  
1028 embryos

| Group                | Embryos<br>evaluate<br>d (cells) | No. of cells           |           |           |                   |
|----------------------|----------------------------------|------------------------|-----------|-----------|-------------------|
|                      |                                  | 1n                     | 2n        | Aneuploid | Total<br>abnormal |
| ICSI                 | 10 (28)                          | 1 (4%) <sup>a</sup>    | 13 (46 %) | 14 (50%)  | 15 (54%)          |
| Haploid<br>partheno  | 20 (42)                          | 15 (35%) <sup>ab</sup> | 8 (19%)   | 19 (45%)  | 27 (64%)          |
| Haploid<br>Androgeno | 9 (11)                           | 9 (81%) <sup>bc</sup>  | 0 (0%)    | 2 (19%)   | 2 (19%)           |

1029 ICSI: intracytoplasmic sperm injection using X-sexed sperm. Androgenetic haplo-X: androgenetic  
1030 haploid embryos generated using X-chromosome sexed sperm.

1031  
1032  
1033  
1034  
1035  
1036  
1037  
1038  
1039  
1040  
1041  
1042  
1043  
1044  
1045  
1046  
1047  
1048  
1049  
1050  
1051  
1052  
1053  
1054  
1055  
1056  
1057  
1058  
1059  
1060  
1061  
1062  
1063  
1064  
1065  
1066  
1067  
1068  
1069  
1070

1071  
1072  
1073 Figure captions

1074  
1075 Figure 1- Representative images of a 1-cell stage zygote fixed at 20 h after activation showing DNA  
1076 staining (upper) and phase-contrast images (lower) of a (a,b) ICSI, biparental embryo obtained by  
1077 ICSI (2 pronuclei), (c,d) Haploid partheno, haploid parthenogenetic embryo (1 female pronucleus)  
1078 obtained by oocyte activation using ionomycin followed by cyclohexymide, and (e,f) Haploid  
1079 androgeno, haploid androgenetic embryo (1 male pronucleus) obtained by ICSI + oocyte  
1080 enucleation. ICSI, intracytoplasmic sperm injection using female-sorted semen. Scale bar = 50  $\mu$ m.

1081  
1082 Figure 2. Morphological assessment of haploid and diploid embryos at Day-7 (168 h) of culture.  
1083 (a) Percentage of different blastocyst stages. (b) Representative images of the most advanced  
1084 embryos from different controls and haploid groups. IVF, in vitro fertilized; ICSI, intracytoplasmic  
1085 sperm injection using female-sorted semen; Haploid partheno, haploid parthenogenetic embryos  
1086 obtained by oocyte activation using ionomycin followed by cyclohexymide; Haploid androgeno,  
1087 haploid androgenetic embryo obtained by ICSI + oocyte enucleation. M: compact morula; CB:  
1088 cavitating blastocyst; BL: blastocyst. Scale bar = 100  $\mu$ m.

1089  
1090 Figure 3. Cell number of diploid and haploid morula and blastocyst stage embryos. (a) Nuclear  
1091 counts and (b) representative images of morula and blastocyst stage embryos harvested at Day-6  
1092 (144 h) and 168 h (day 7) of culture, respectively. IVF, in vitro fertilized; ICSI, intracytoplasmic  
1093 sperm injection using female-sorted semen; Haploid partheno, haploid parthenogenetic embryos  
1094 obtained by oocyte activation using ionomycin followed by cyclohexymide; Haploid androgeno,  
1095 haploid androgenetic embryo obtained by ICSI + oocyte enucleation. Scale bar = 25  $\mu$ m.

1096  
1097 Figure 4. Karyotype analysis of haploid and diploid morula stage (Day-6) embryonic blastomeres.  
1098 (a) Group chromosomal number distributions showing mean values (blue horizontal lines) with  
1099 standard deviations (red horizontal lines). (b-e) Representative images of DAPI-stained  
1100 chromosomal spreads of embryonic blastomeres from (b) diploid ICSI (60 chromosomes) (c)  
1101 haploid parthenote (30 chromosomes), (d) haploid androgenote (30 chromosomes), and (e)  
1102 aneuploid (40 chromosomes) parthenote embryo. ICSI, intracytoplasmic sperm injection using  
1103 female-sorted semen; Haploid partheno, haploid parthenogenetic embryos obtained by oocyte  
1104 activation using ionomycin followed by cyclohexymide; Haploid androgeno, haploid androgenetic  
1105 embryo obtained by ICSI + oocyte enucleation

1106  
1107 Figure 5. Developmental patterns of arrested embryos at 2- to 3-cell stage. (a) Proportion of  
1108 embryos showing mitotic errors in relation to total number of arrested embryos. (b) Nuclear  
1109 morphologies found in the zygotes showing developmental arrest. (c) Representative images of  
1110 developmentally arrested embryos; (A, E) non-activated oocyte, (B, F) multinucleated zygote, (C,  
1111 G) Anucleate blastomere, (D, H) Micronuclear formation. PB, polar body; mp, metaphase plate;  
1112 n, nucleous; mn, micronucleous; ICSI, intracytoplasmic sperm injection using female-sorted  
1113 semen; Haploid partheno, haploid parthenogenetic embryos obtained by oocyte activation using  
1114 ionomycin followed by cyclohexymide; Haploid androgeno, haploid androgenetic embryo obtained  
1115 by ICSI + oocyte enucleation. Scale bar 50  $\mu$ m.

1116  
1117 Figure 6. Relative gene expression of different imprinted and X-chromosome linked genes on  
1118 haploid and diploid 8-cell stage embryos obtained by ICSI, parthenogenetic activation or ICSI +  
1119 enucleation. Blue boxes: X-linked genes XIST, PGK1 and HPRT on Chromosome X; Green boxes:  
1120 genes on the KNCQ1 locus KCNQ1OT1, CDKN1 and PHLDA2 (The three housekeeping genes  
1121 used were GAPDH, ACTB and SF3A).

1122



1123 Figure 7. Relative gene expression of different imprinted and X-chromosome linked genes on  
1124 haploid and diploid morula stage embryos obtained by ICSI, parthenogenetic activation or ICSI +  
1125 enucleation. Blue boxes: X-linked genes XIST, PGK1 and HPRT on chromosome X; Green boxes:  
1126 genes on the KNCQ1 locus KCNQ1OT1, CDKN1 and PHLDA2 (housekeeping genes used for  
1127 normalization were GAPDH, ACTB and SF3A).

1128  
1129 Figure 8. Relative gene expression of DNA methylation-related enzymes and DNA methylation  
1130 profiles of XIST and KCNQ1 DMR. (a) Relative gene expression of DNMT1, DNMT3B and TET1  
1131 in biparental diploid female (ICSI), haploid parthenogenetic and androgenetic embryos. ICSI (XX),  
1132 intracytoplasmic sperm injection using female sorted-sperm; ICSI (XY), intracytoplasmic sperm  
1133 injection using male sorted-sperm; Haploid Partheno: haploid parthenogenetic embryo obtained by  
1134 oocyte activation using ionomycin followed by cyclohexymide; Haploid Androgeno, haploid  
1135 androgenetic embryo obtained by ICSI + oocyte enucleation; Fibroblast (XX), female fibroblast  
1136 cells; Fibroblast (XY), male fibroblast cells.

1137  
1138 Supplemental figure 1  
1139 Proportion of cleaved embryos at the 8-cell stage at 48h of culture. IVF, in vitro fertilized; ICSI,  
1140 intracytoplasmic sperm injection using female-sorted semen; Haploid partheno, haploid  
1141 parthenogenetic embryos obtained by oocyte activation using ionomycin followed by  
1142 cyclohexymide; Haploid androgeno, haploid androgenetic embryo obtained by ICSI + oocyte  
1143 enucleation.

1144  
1145 Supplemental figure 2  
1146 Morphological assessment of haploid androgenetic embryos produced with sperm carrying Y-  
1147 chromosome at 144 h of culture. Representative (a) morphologies and (b, c) nuclear counts of  
1148 embryos harvested at Day-6 (144 h) of culture.

ICSI

HAPLOID PARTHENO

HAPLOID ANDROGENO

A

B

C

50  $\mu$ m

D

E

F

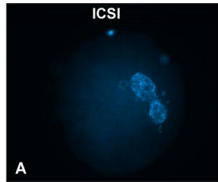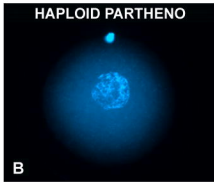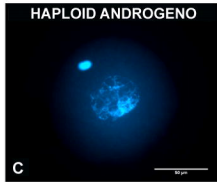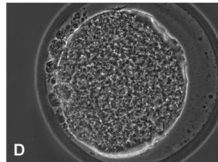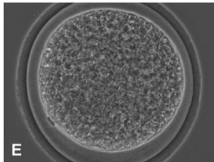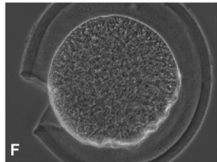

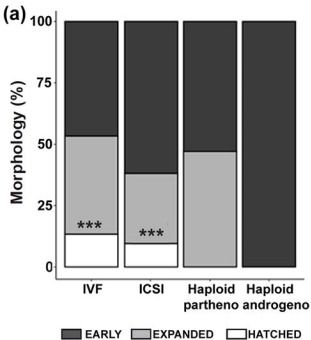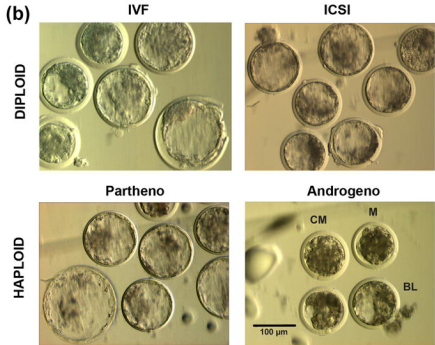

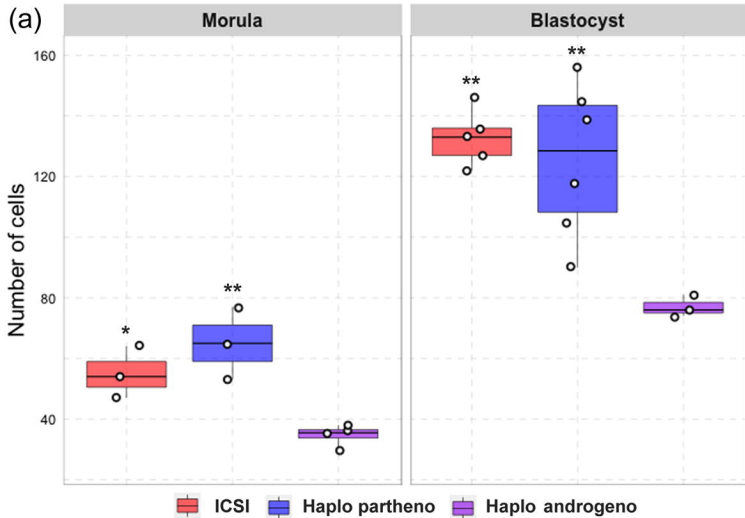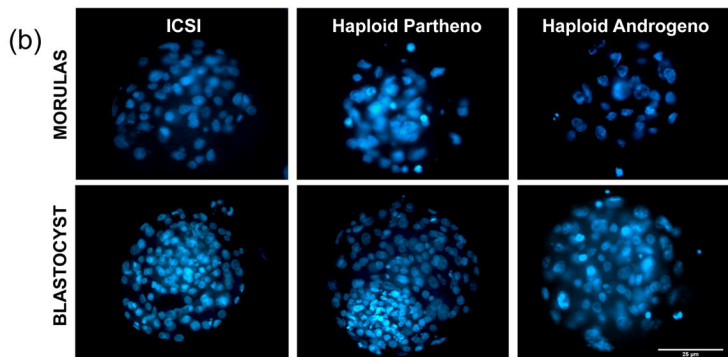

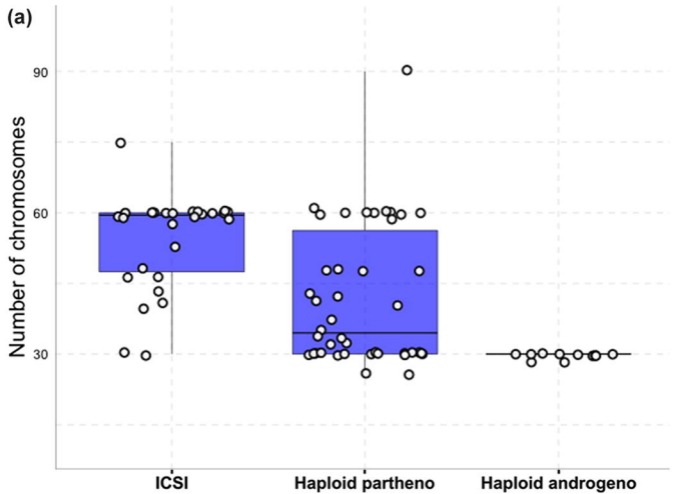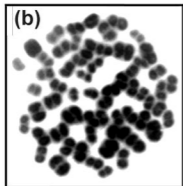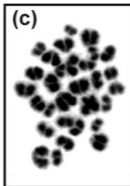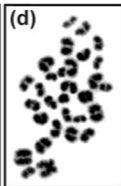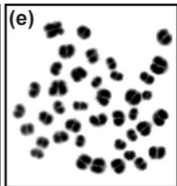

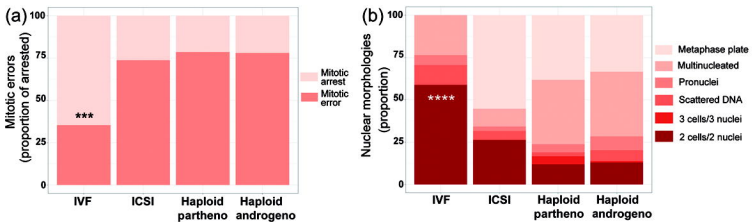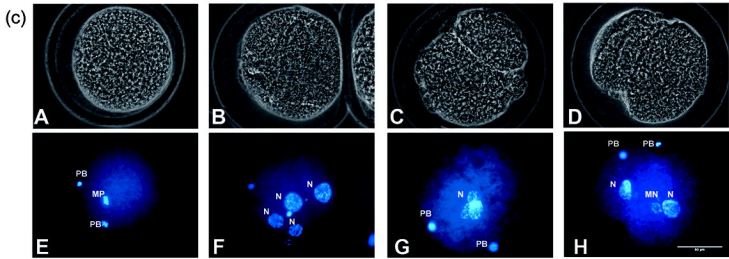

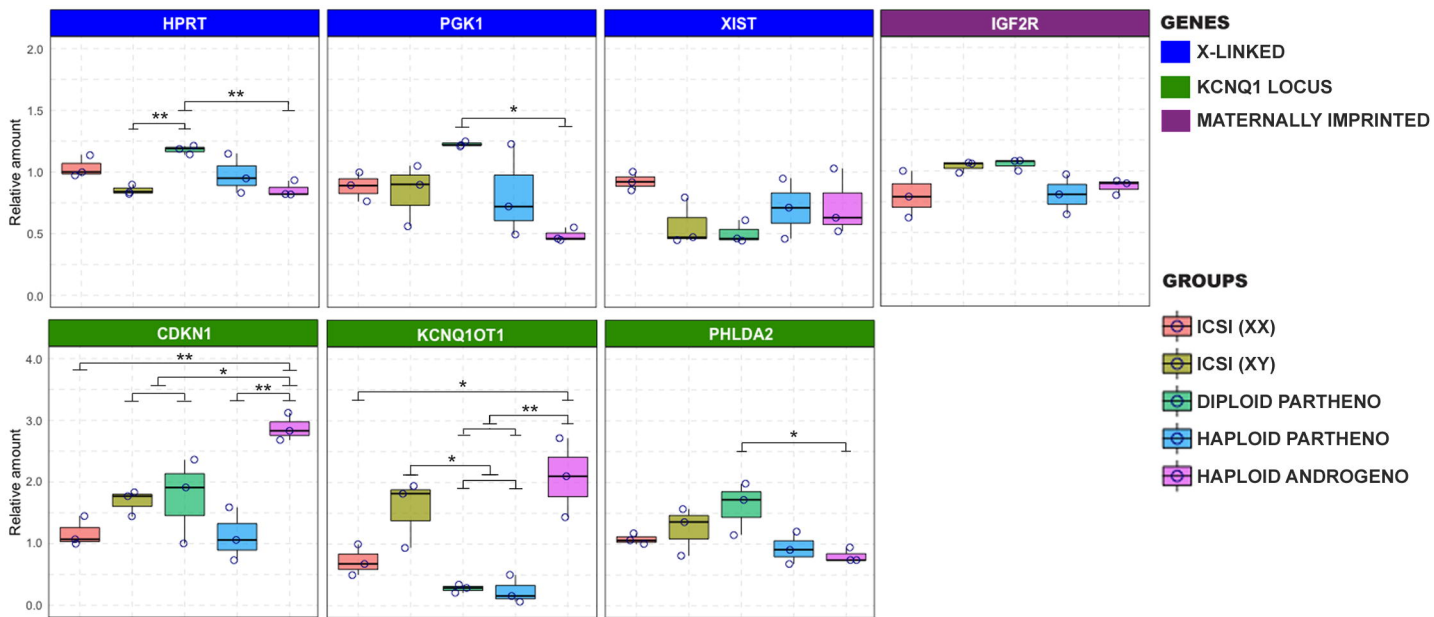

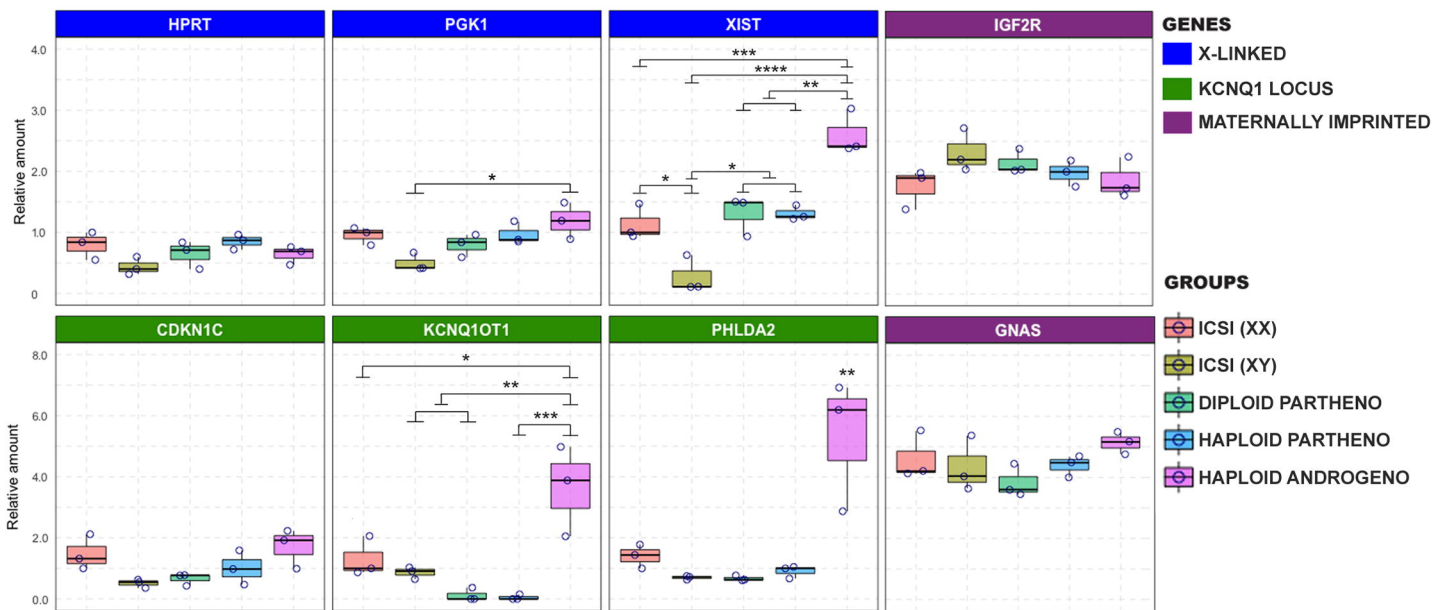



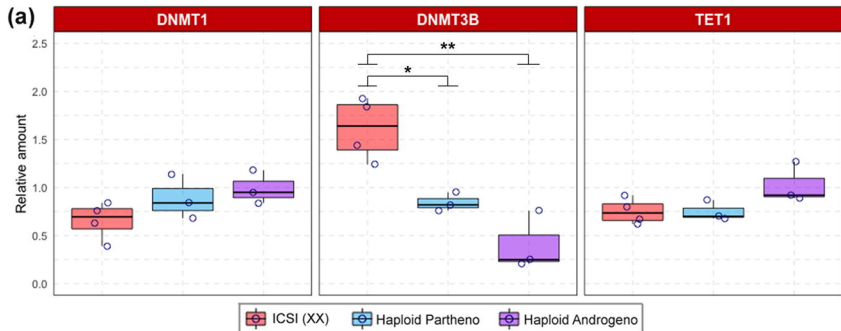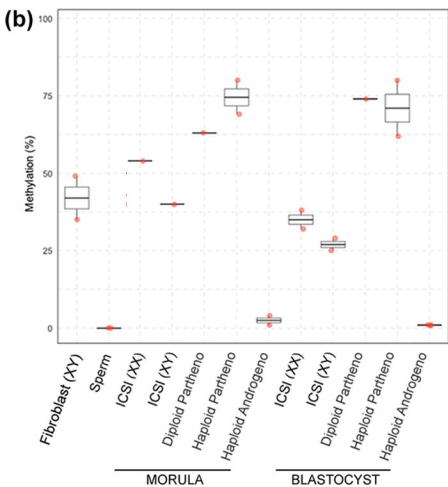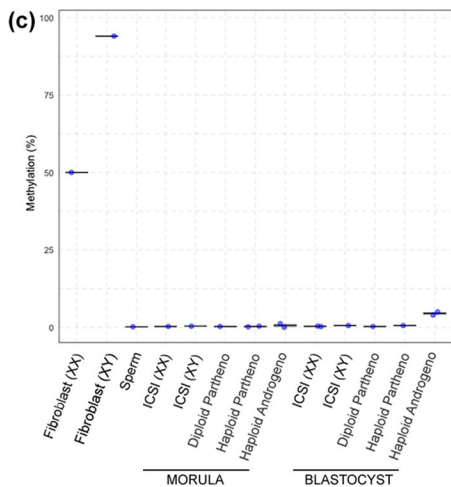

Source: http://biorxiv.org/content/10.1101/2020.10.23.350405v1.full.pdf
